# Supplementary material for: An approach to aliphatic 1,8-stereocontrol: diastereoselective syntheses of (±)-patulolide C and (±)-epipatulolide C
Source: Royal Society of Chemistry journal article supplement (doi:10.1039/c2ob25992c), 2012-01-01

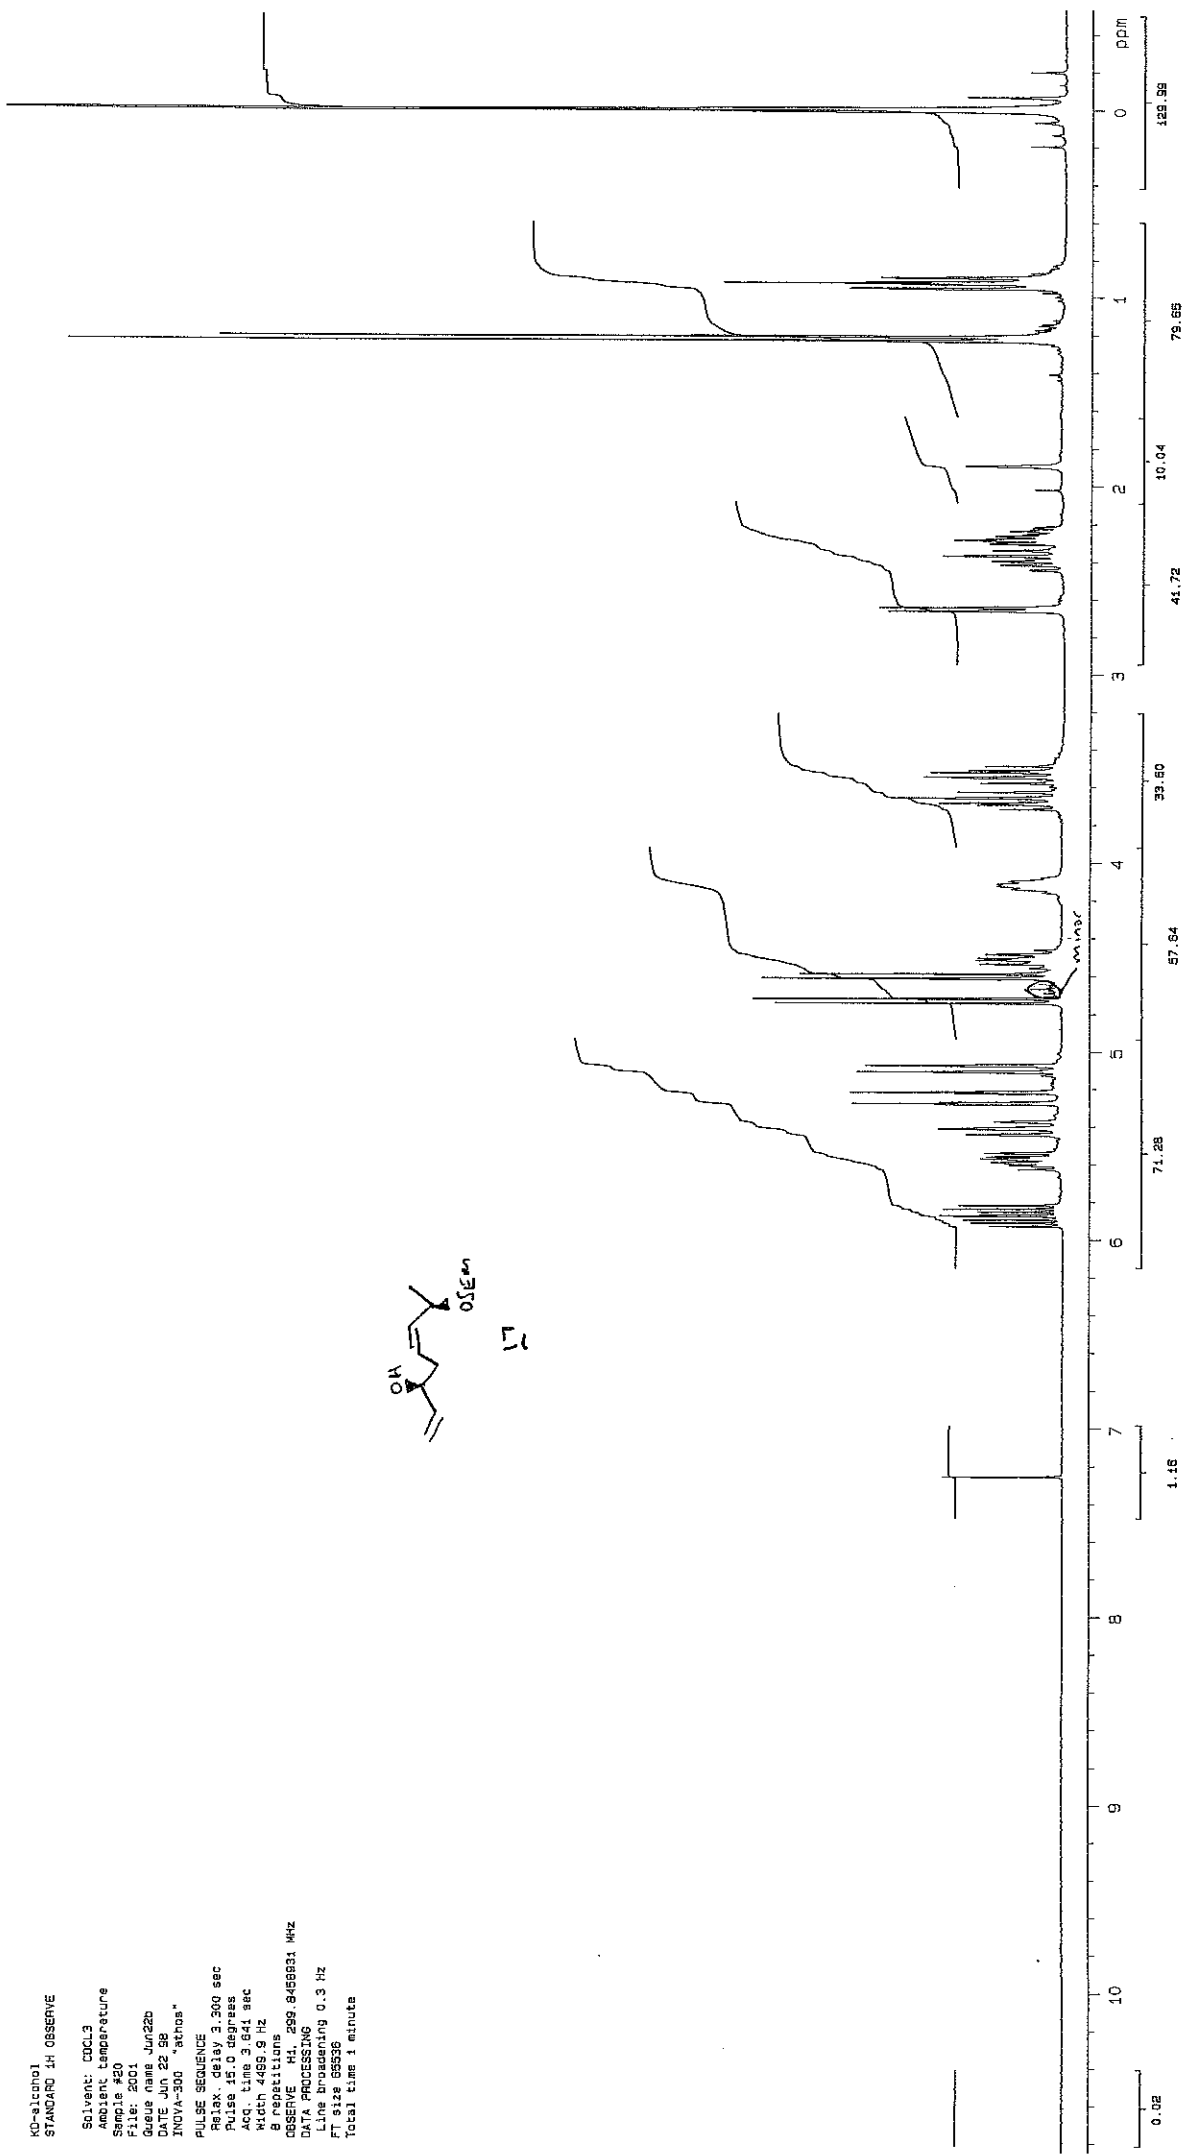

NO-ethanol  
STANDARD 1H OBSERVE  
Solvent: CDCl3  
Ambient temperature  
Sample #20  
File: 2001  
Queue name Jun22b  
DATE Jun 22 58  
INVOYA-300 "athos"  
PULSE SEQUENCE  
Relax: delay 3.500 sec  
Pulse 15.0 degrees  
Acq. time 3.641 sec  
Width 4469.9 Hz  
8 repetitions  
OBSERVE H1, 299.8458031 MHz  
DATA PROCESSING  
Line broadening 0.3 Hz  
FT size 65536  
Total time 1 minute

KD-alcohol  
STANDARD 1H OBSERVE

```

Solvent: CDCl3
Ambient temperature
Sample #20
Acq. file: 2002
F2 - Acquisition name Jun28b
Date_ Time Jun 28 98
INSTRUMENT: INNOVA-300
PULSE SEQUENCE
Pulse 45.0 degrees
Acq. time 1.638 sec
Width 20000.0 Hz
544 repetitions
NUC1: 13C
OBSERVE C13: 75.3632
DECOUPLE H1: 299.8477
Power 40 dB
continuously on
WALTZ-16 is modulated
DATA PROCESSING
Line broadening 1.0 Hz
SFT size 65536
Total time 14 minutes

```

C[C@H](O)C=C[C@H](O)C

continuously on  
WALTZ-16 modulated  
DATA PROCESSING  
Line broadening 1.0  
FT size 65536  
Total time 14 minutes

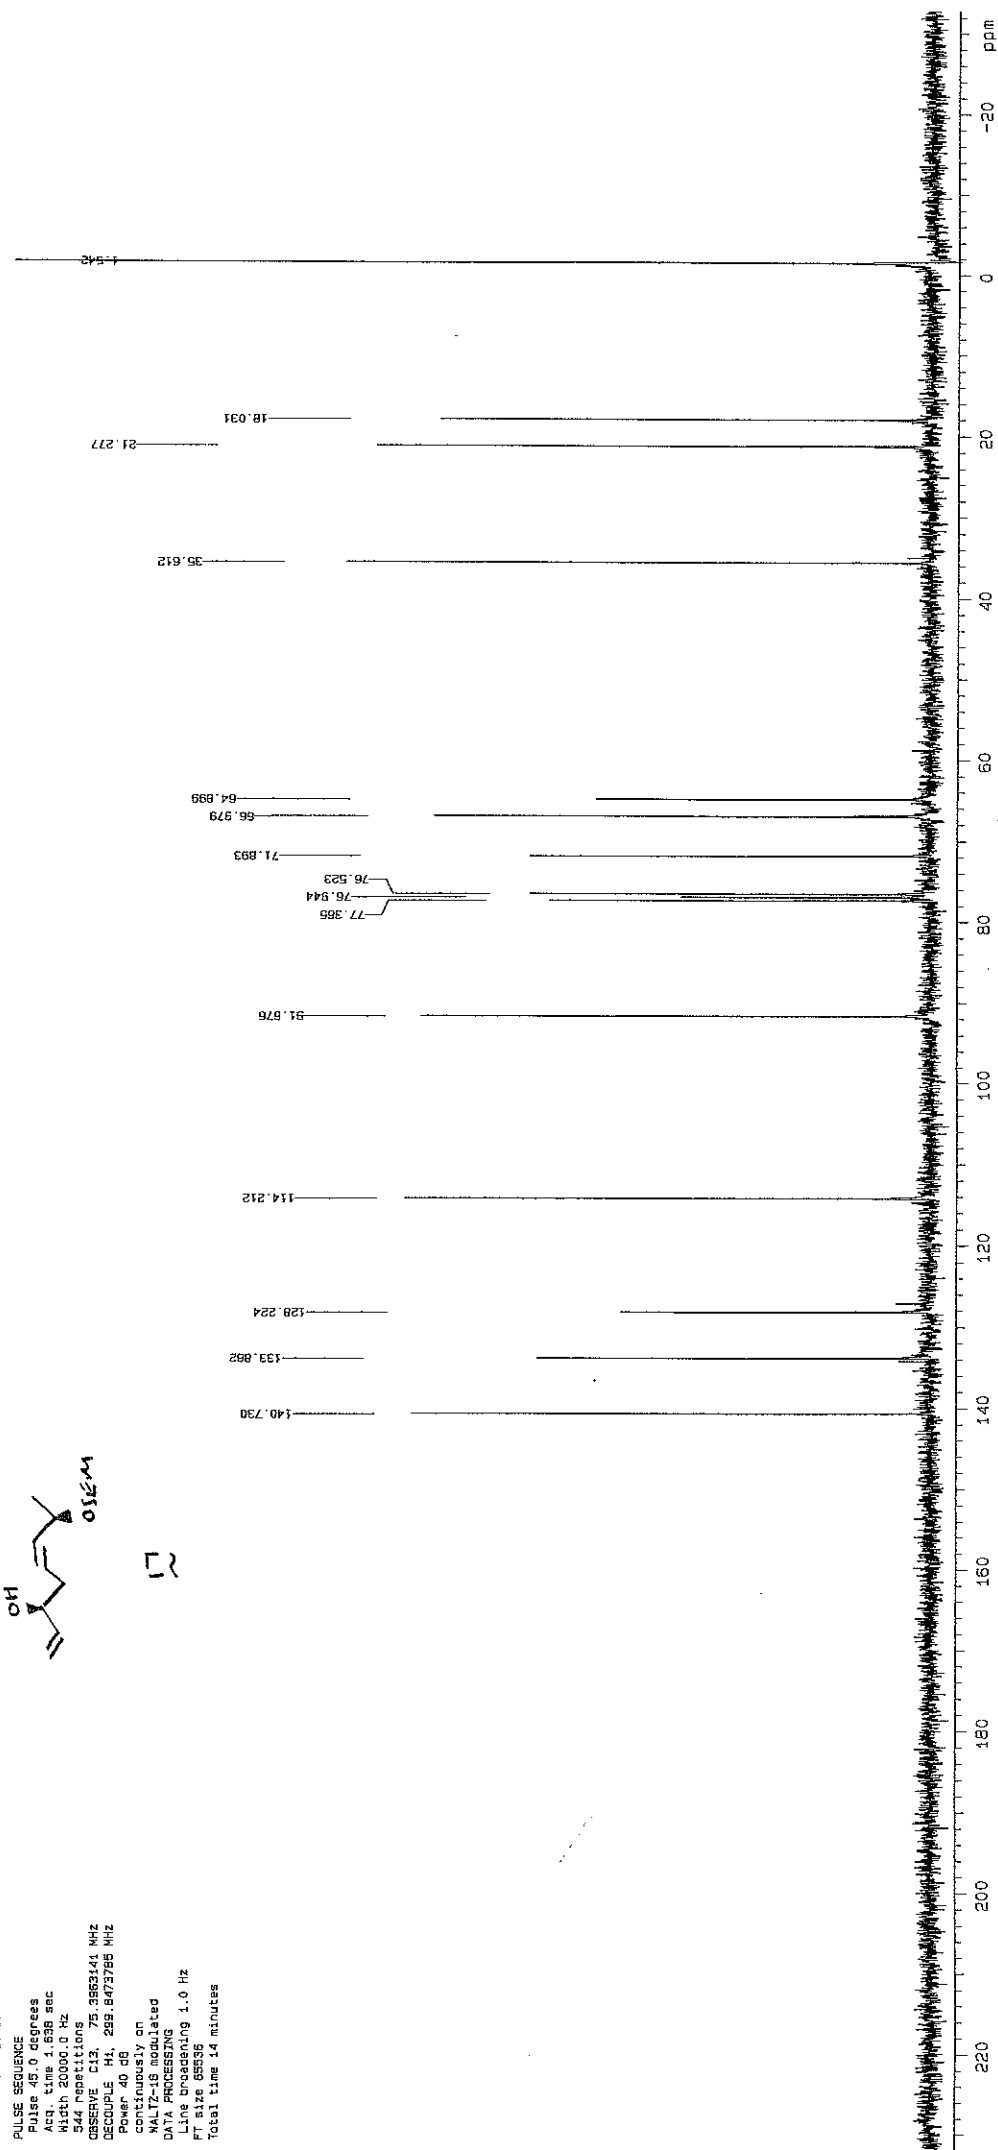



Kats Darling K0222 direct  
STANDARD 1H OBSERVE

Solvent: CDCl3  
Ambient temperature  
Sample #21  
File: 2102  
Date name Jun1b  
DATE Jun 11 SB  
INOVA-300 "athos"  
PULSE SEQUENCE  
Pulse 45.0 degrees  
Acq. time 1.638 sec  
Width 20000.0 Hz  
112 repetitions  
OBSERVE C13, 75.3553141 MHz  
DECOUPLE H1, 288.8473785 MHz  
Power 40 dB  
continuously on  
WALTZ-16 modulated  
DATA PROCESSING  
Line broadening 1.0 Hz  
FI size 65536  
Total time 3 minutes

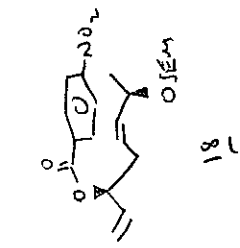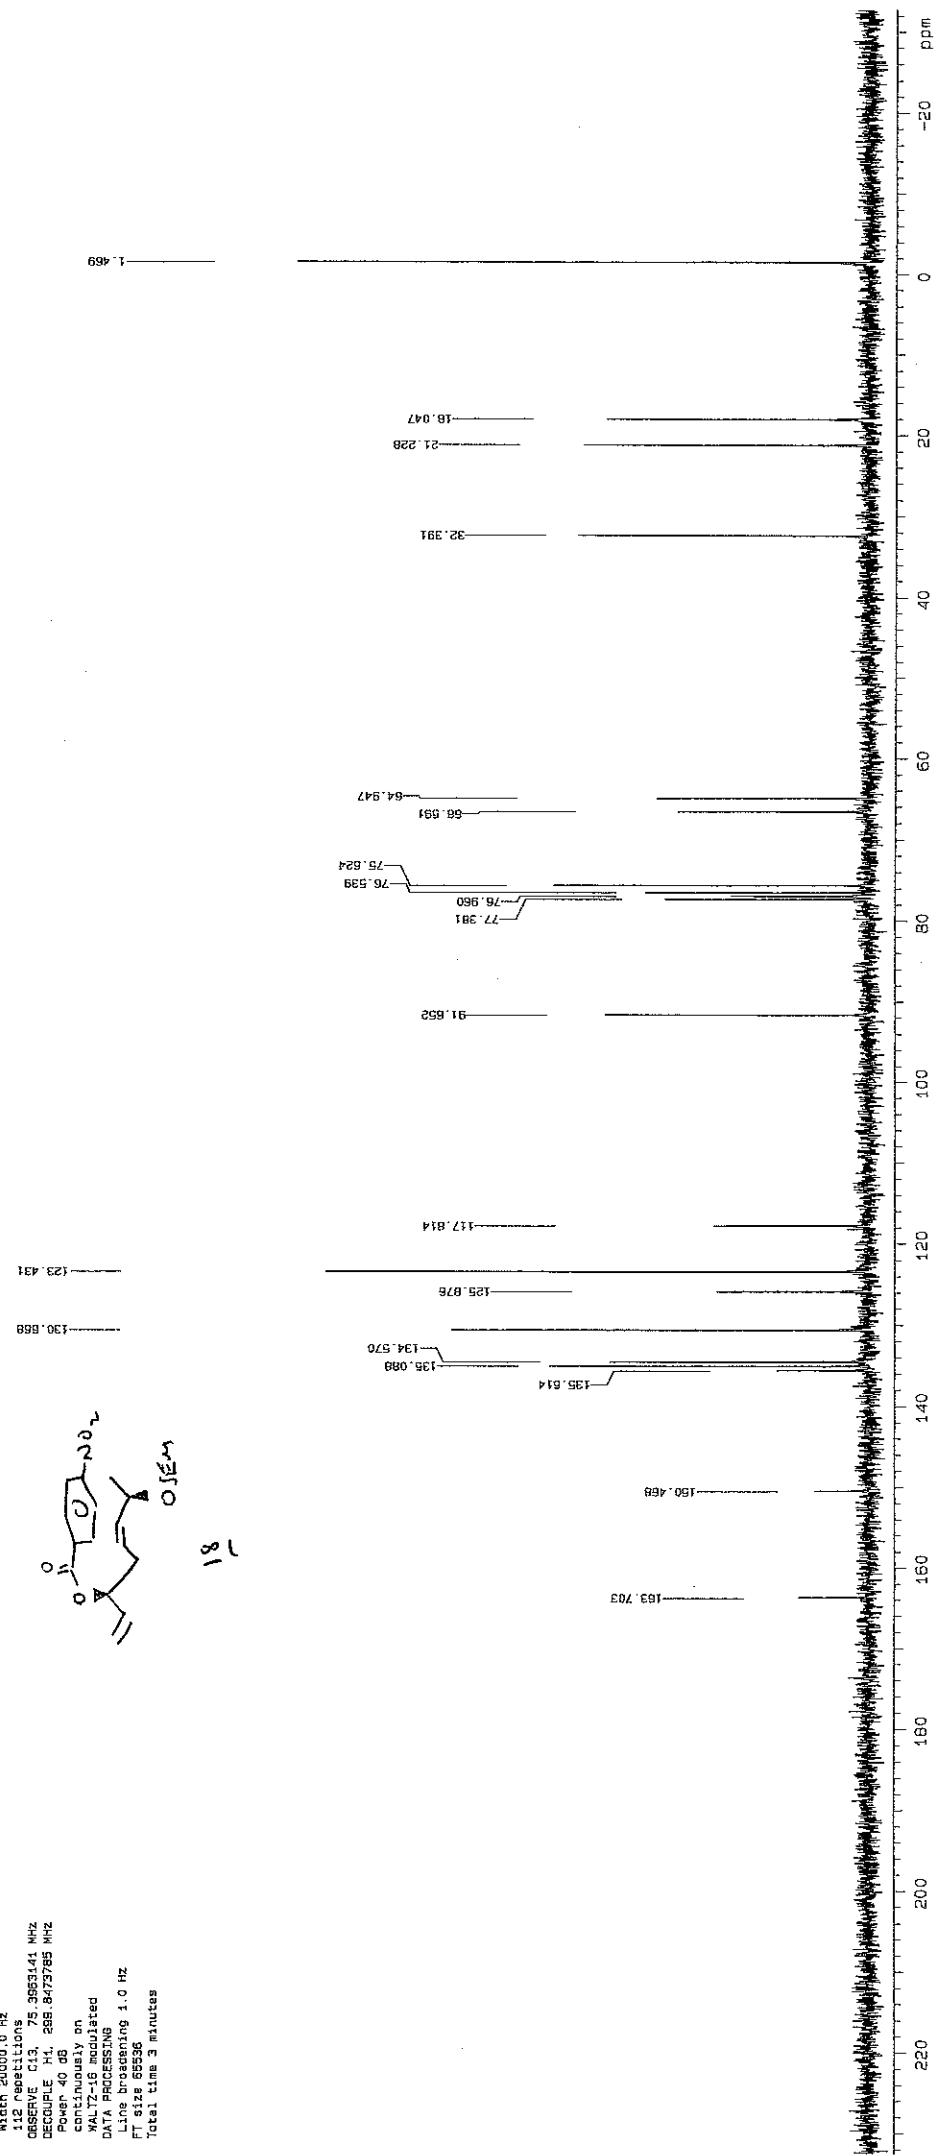

Kate Durling K08231  
STANDARD 1H OBSERVE

Solvent: CDCl3  
Ambient temperature  
Sample #9  
File: 801  
Queue name Jun12a  
DATE Jun 12 06  
INOVA-300 "achos"

PULSE SEQUENCE

Relax. delay 3.000 sec  
Pulse 45.0 degrees  
Acq. time 3.641 sec  
Width 4499.9 Hz  
# repetitions 8

OBSERVE H1, 299.8448953 MHz  
DATA PROCESSING  
Line broadening 0.3 Hz  
FT size 85536  
Total time 1 minute

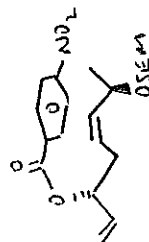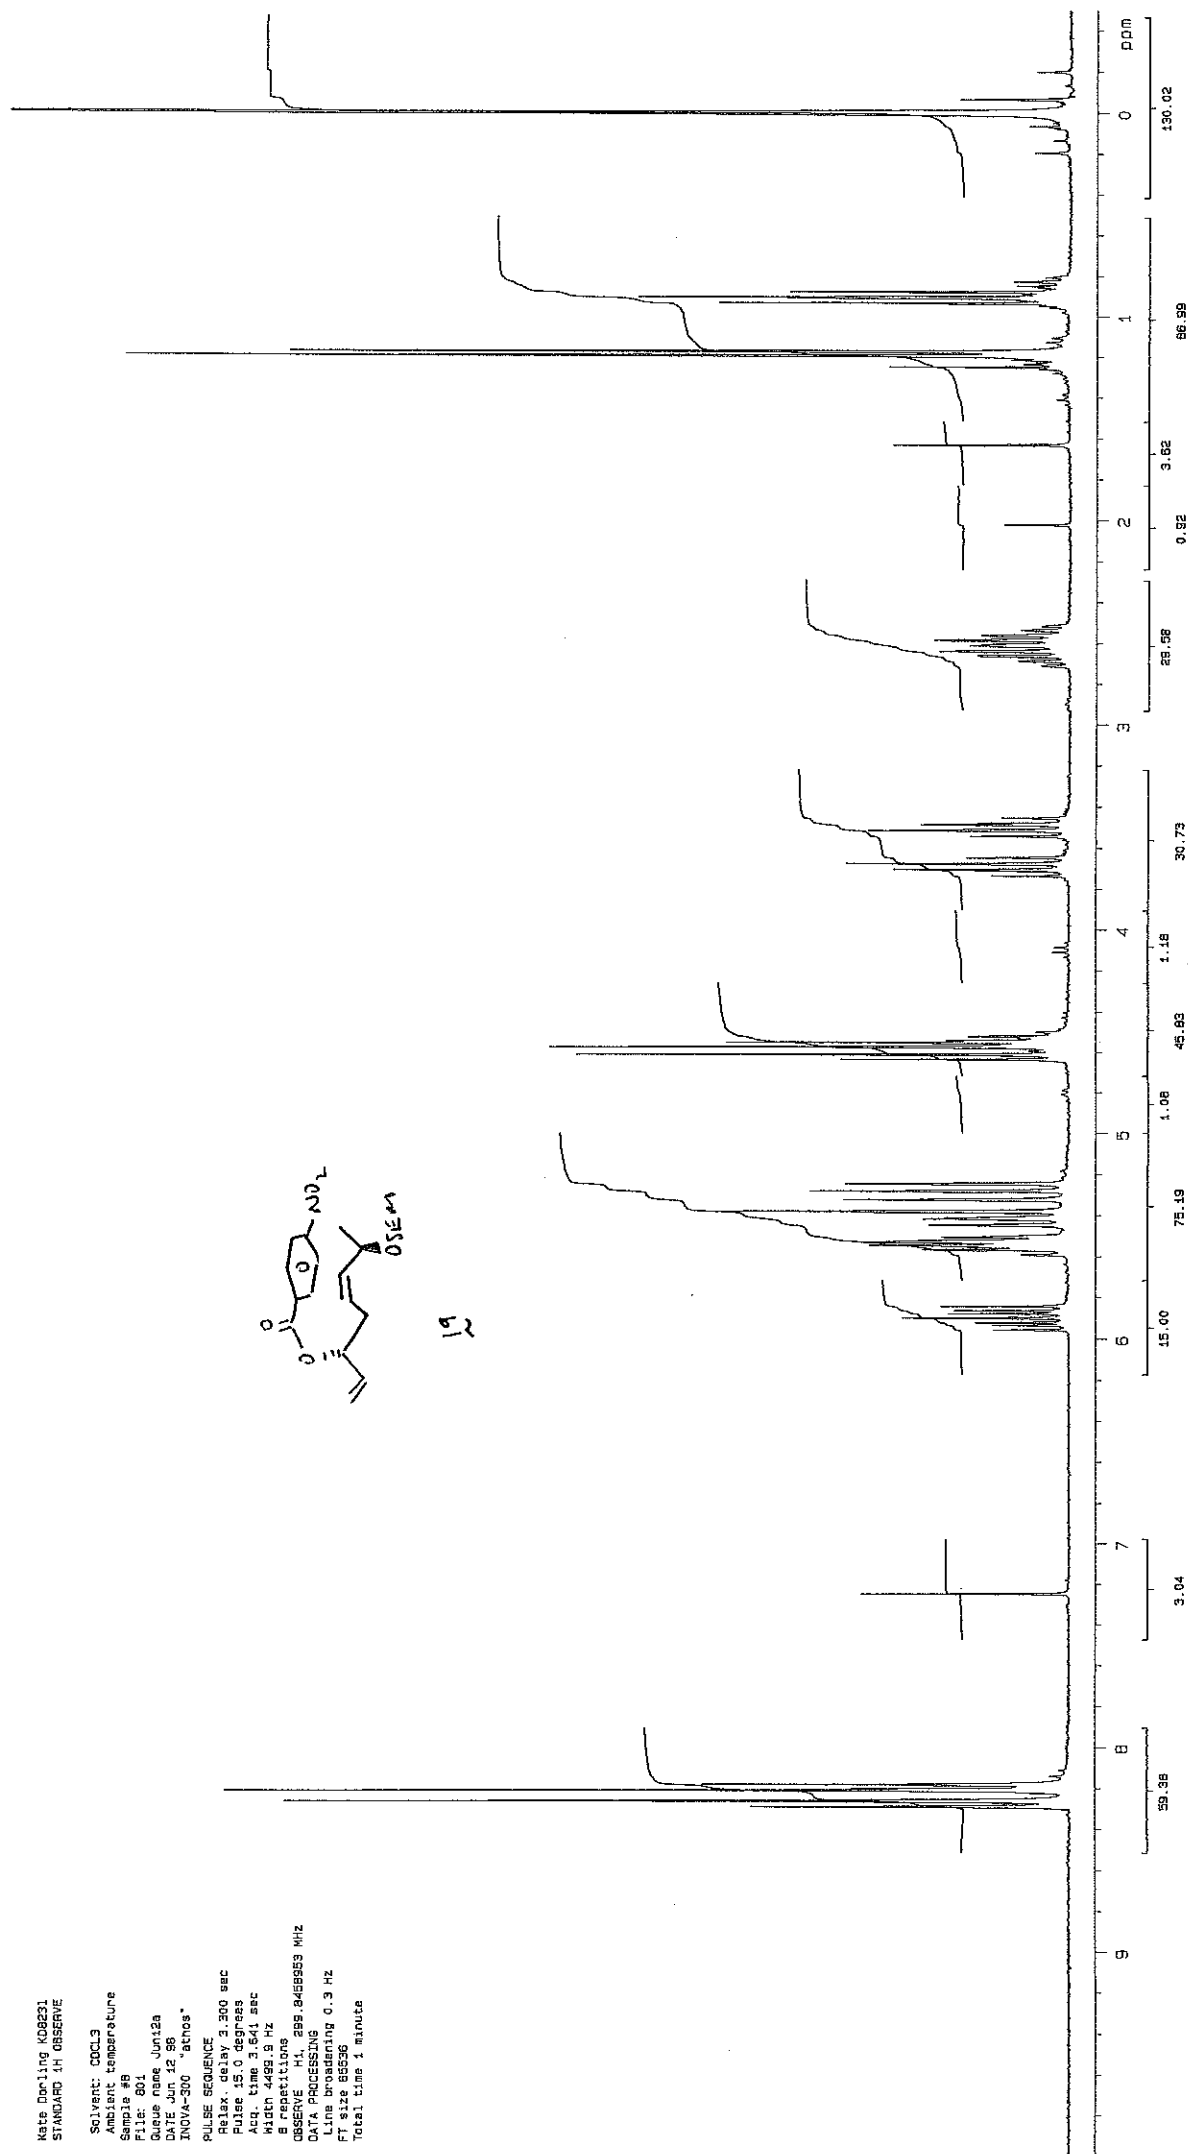

Kate Dorling K08231  
STANDARD 1H OBSERVE

Solvent: COCL<sub>3</sub>  
Ambient temperature  
Sample #8  
File: B02  
Date: 11/12/98  
Operator: nms  
Acq Date: Jun 12 98  
INNOVA-300 "athos"  
PULSE SEQUENCE  
Pulse 45.0 degrees  
Acq. time 1.639 sec  
Width 2000.0 n Hz  
256 repetitions  
OBSERVE C13 75.3660  
DECOUPLE H1 299.8470  
Power 40 dB  
continuously on  
WALTZ-16 modulated  
DATA PROCESSING  
Line broadening 1.0  
SI size 65536  
Total time 7 minutes

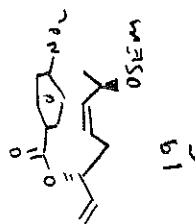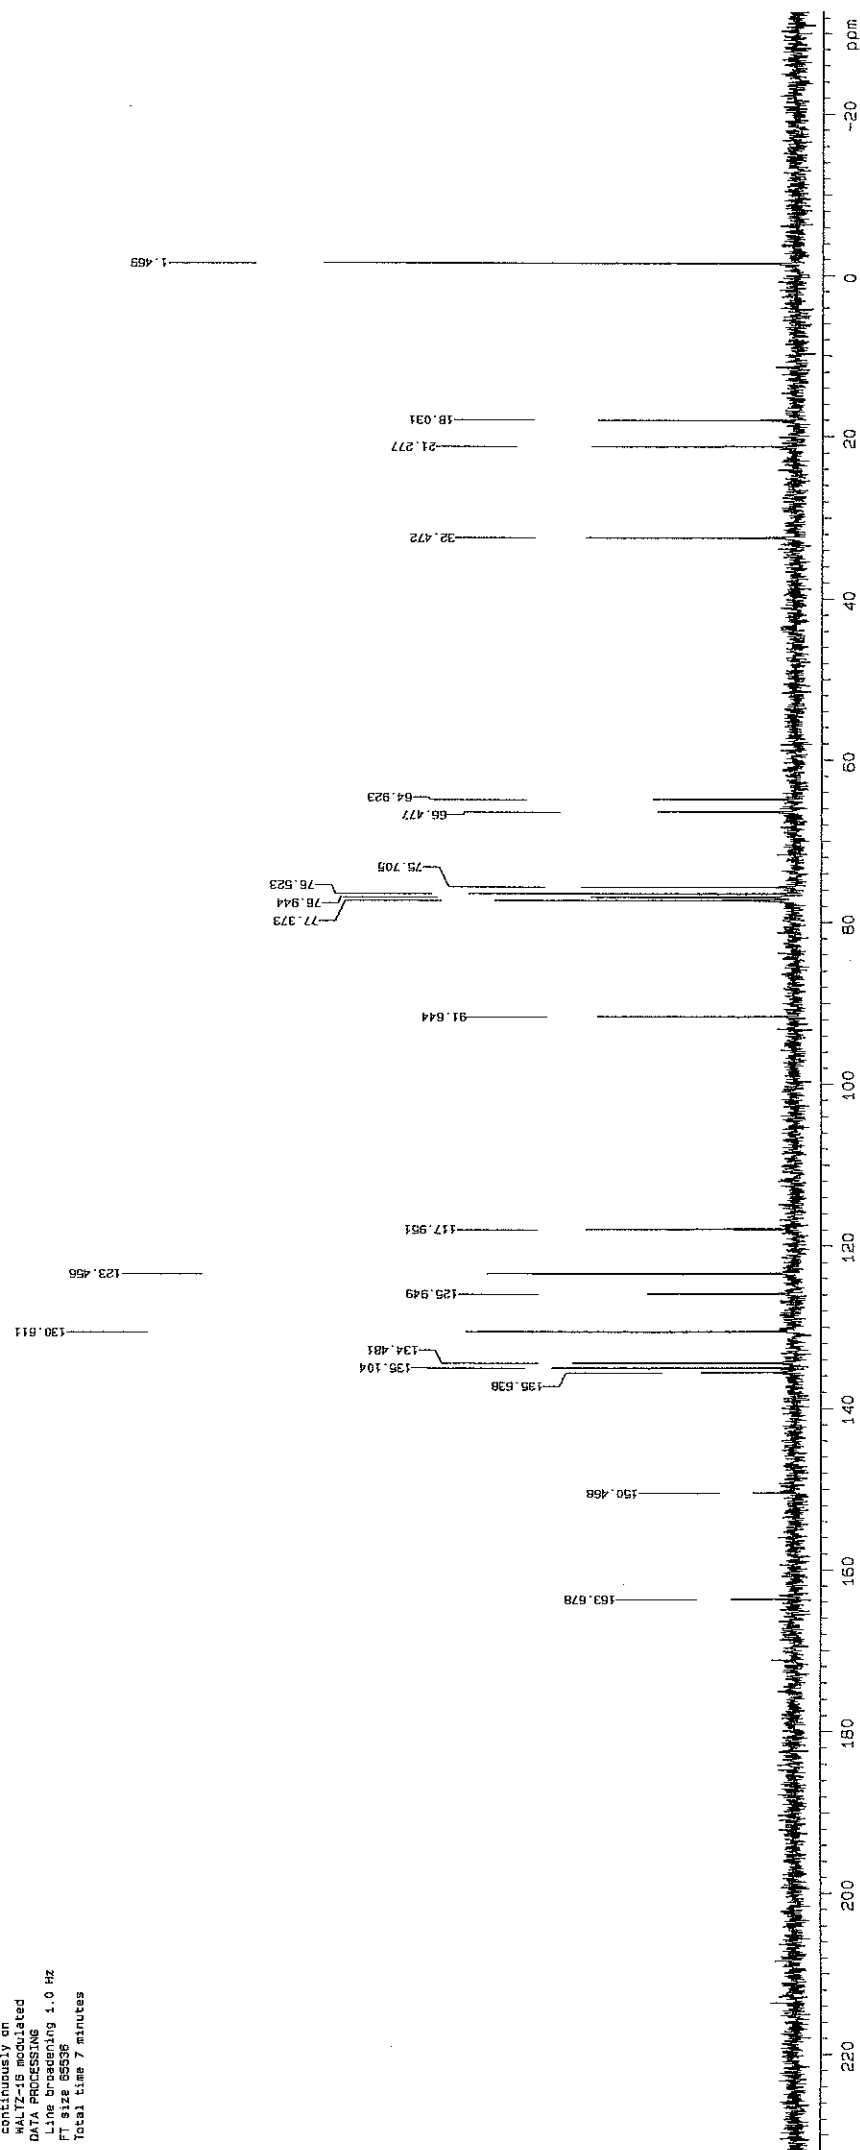

Kate Dorling K0228  
STANDARD 1H OBSERVE

Solvent: CDCl<sub>3</sub>

Ambient temperature

Sample #4

File: 401

Queue name Jun13a

DATE Jun 13 09

INOVA-300 "athos"

PULSE SEQUENCE

Relax. delay 3.300 sec

Pulse 15.0 degrees

Acq. time 3.641 sec

Width 4499.3 Hz

8 repetitions

OBSERVE H1 299.845898 MHz

DATA PROCESSING

Line broadening 0.3 Hz

FI size 68538

Total time 1 minute

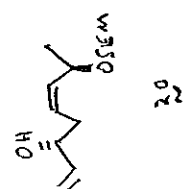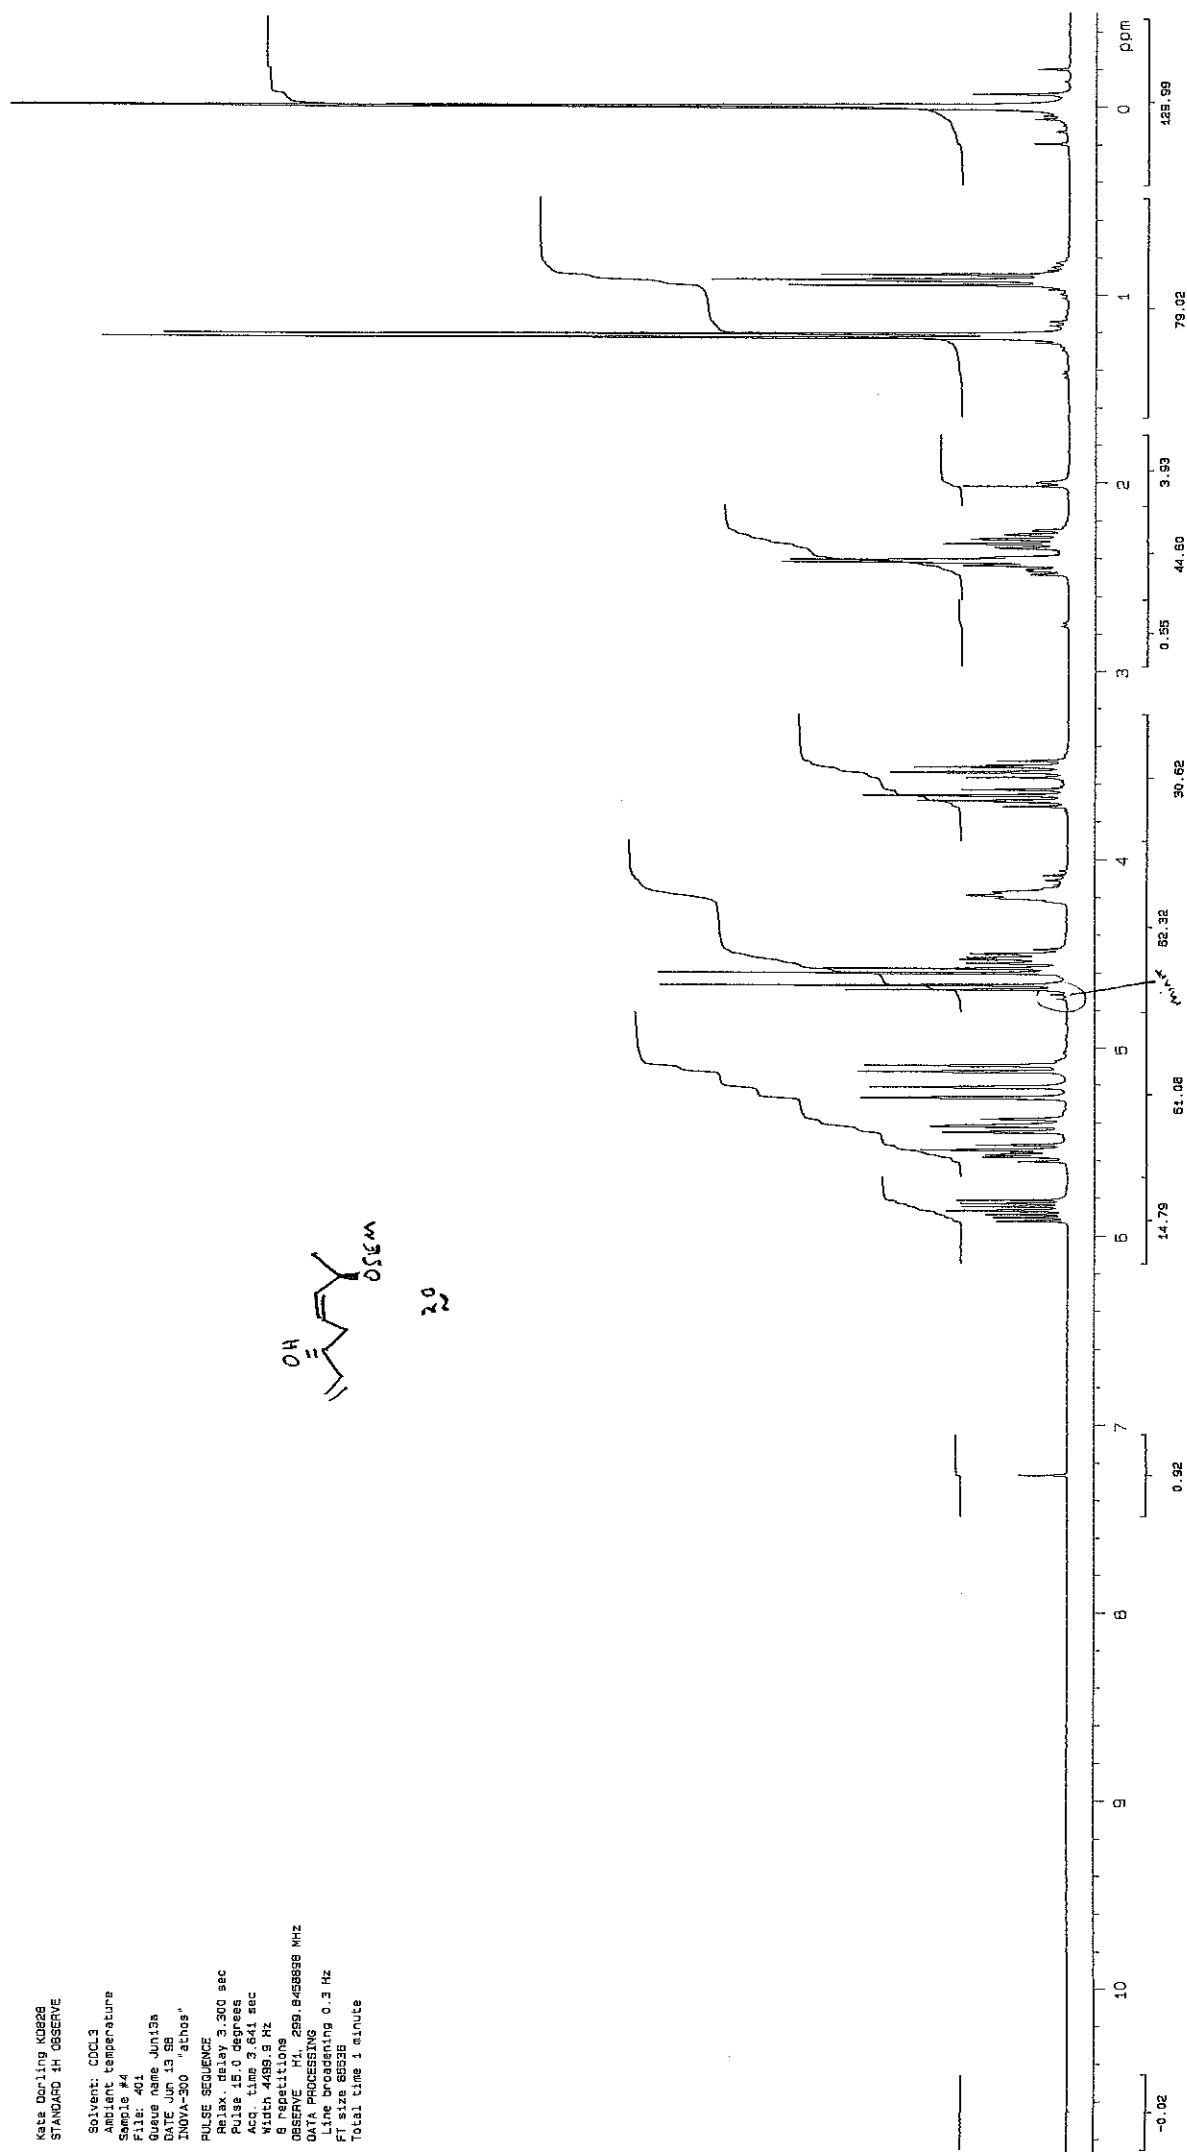





KATE DORLING LINDS/TSQ/NE  
STANDARD 1H OBSERVE

Solvent: CDCl<sub>3</sub>  
Ambient temperature  
Sample #32  
File: 3201  
Date: 11/05/2009  
Time: 11:59  
NOVA-300 "Series"

PULSE SEQUENCE

Relax. delay 3.300 sec

Pulse 15.0 degrees

Acq. time 3.641 sec

Width 4488.9 Hz

Repetitions 1000

Observed F1 89.8458008 MHz

Observed F2 101.6251212 MHz

DATA PROCESSING

Line broadening 0.3 Hz

FT size 65536

Total time 1 minute

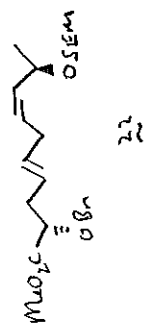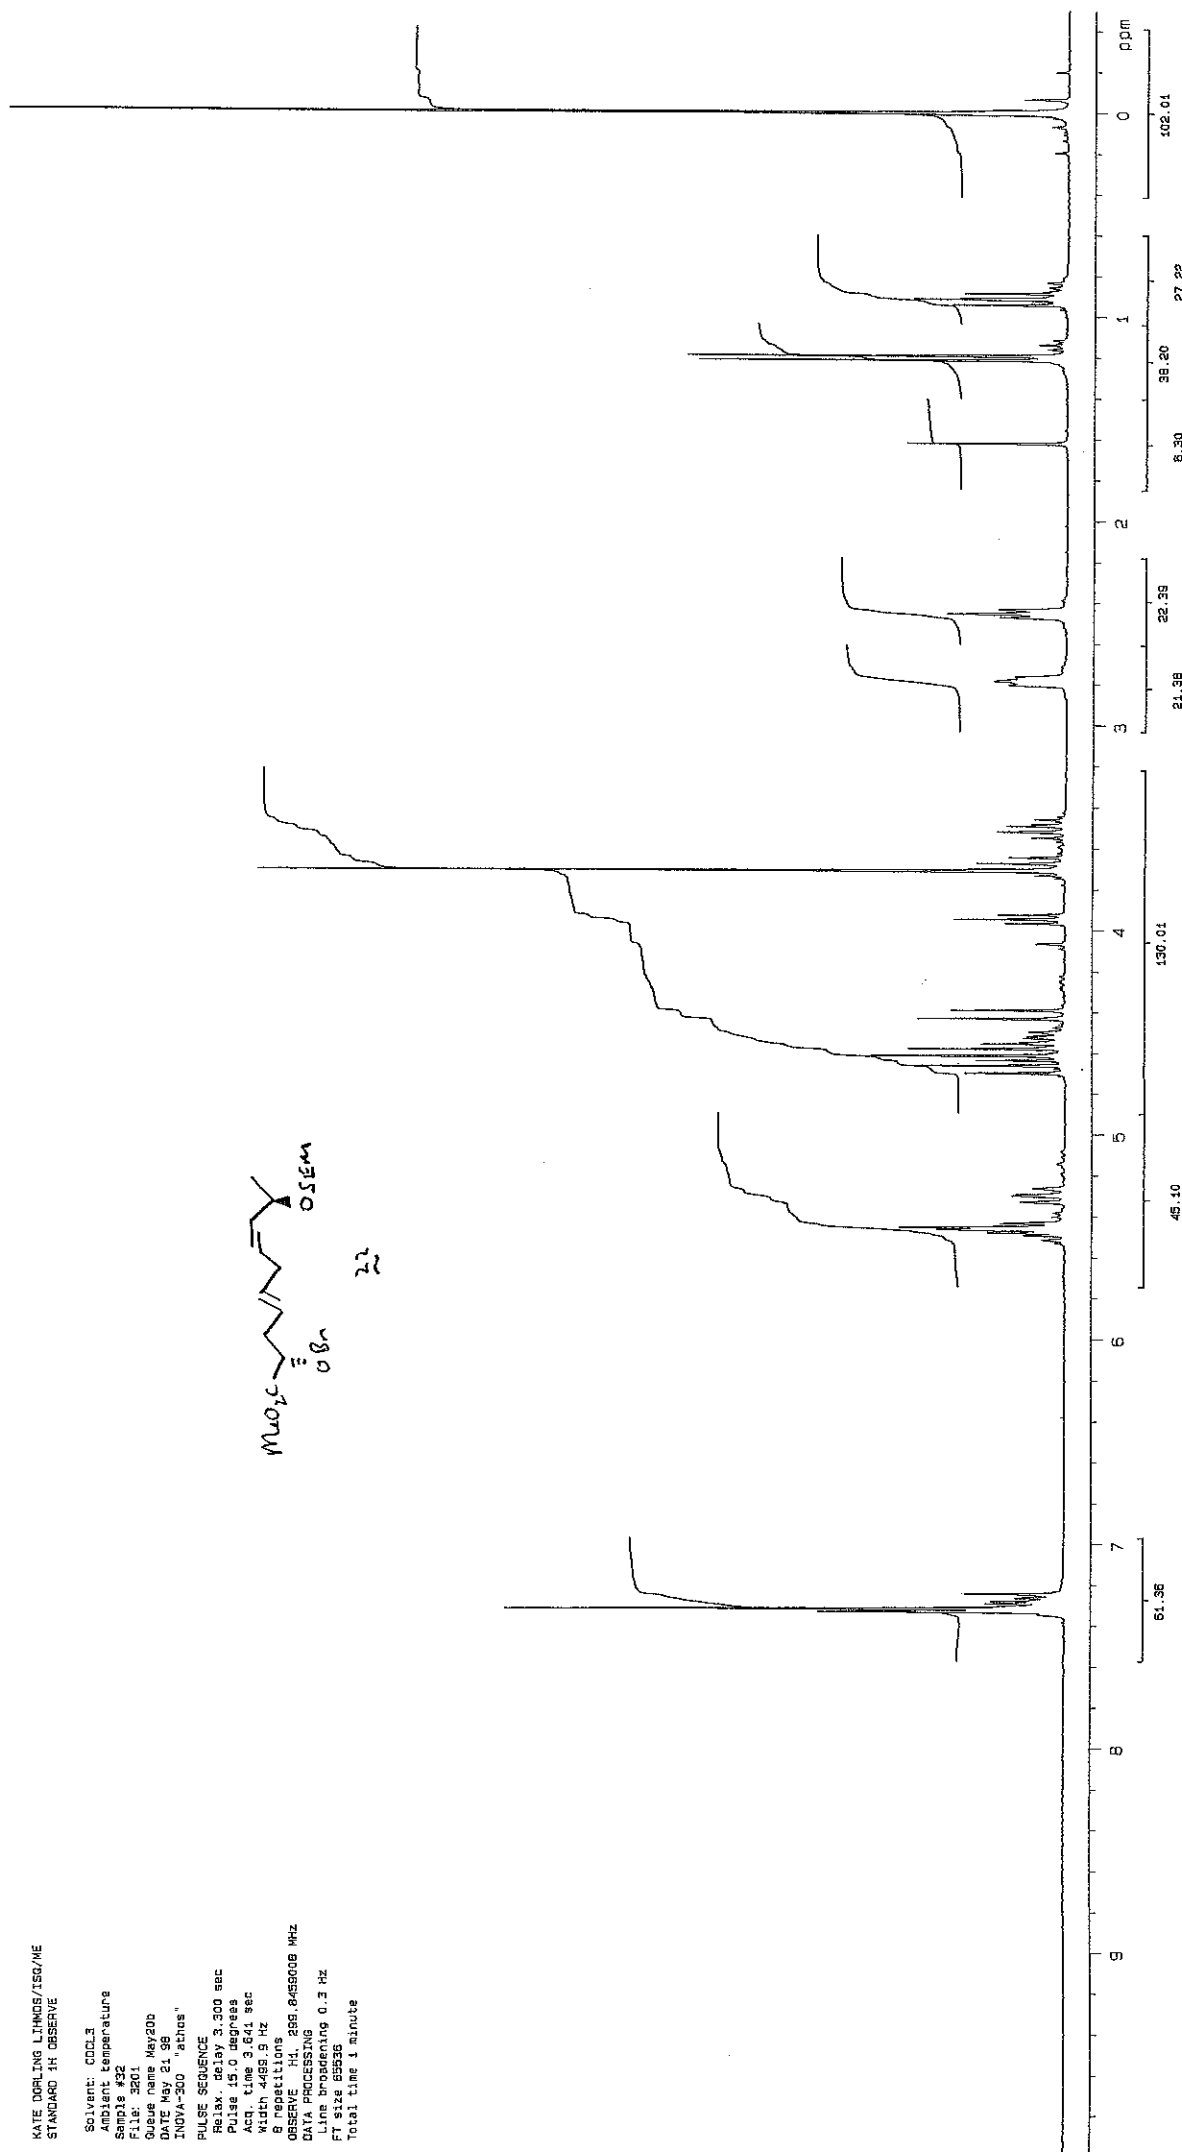

KATE DORLING LIHMDS/ISG/ME  
STANDARD 1H OBSERVE

```

Solvent: CDCl3
Aromatic temperature
Sample #32
File: 3202
Queue name May20b
DATE May 21 98
INNOVA-300 "athos"
PULSE SEQUENCE
Pulse 45.0 degrees
Acq. time 1.638 sec
Wdth 20000.0 Hz
1024 repetitions
OBSERVE C13, 259.847385 MHz
DECOUPLE H1, 259.847385 MHz
Power 40 dB
Continuously on
No decoupling used
DATA PROCESSING
Line broadening 4.0 Hz
F1 size 65356
Total time 47 minutes

```

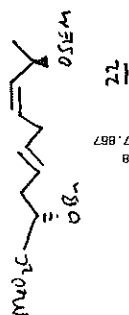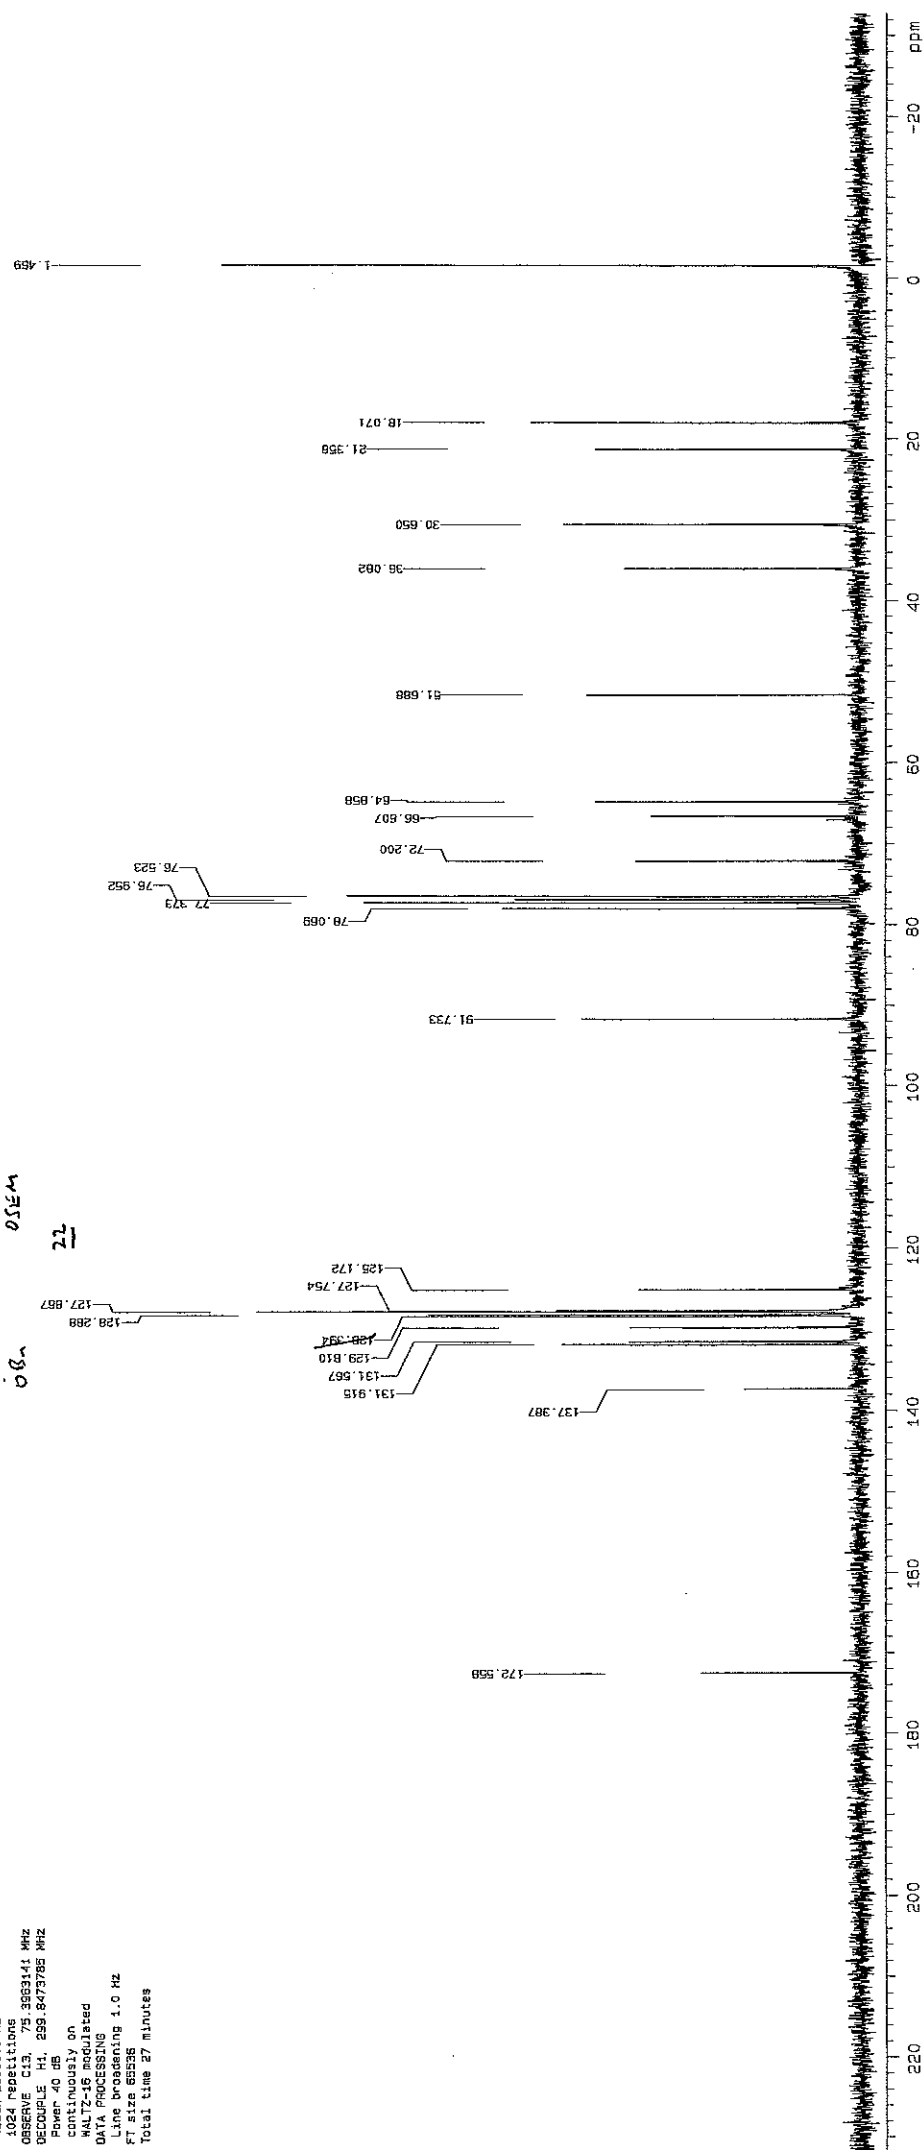

Kate Dörfling U0833 inverted rearrangement  
STANDARD 1H OBSERVE

Solvent: CDCl3  
Ambient temperature  
Sample #31  
File: 3101  
Queue name: Jun15a  
DATE: Jun 15 98  
INOVA-300 8lines"  
PULSE SEQUENCE  
Relax. delay 3.300 sec  
Pulse 15.0 degrees  
Acq. time 3.641 sec  
Width 4499.9 Hz  
8 repetitions  
OBSERVE M1, 299.8458970 MHz  
DATA PROCESSING  
Line broadening 0.3 Hz  
FT size 65536  
Total time 1 minute

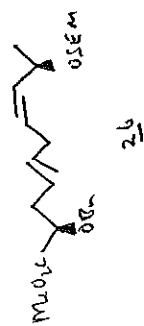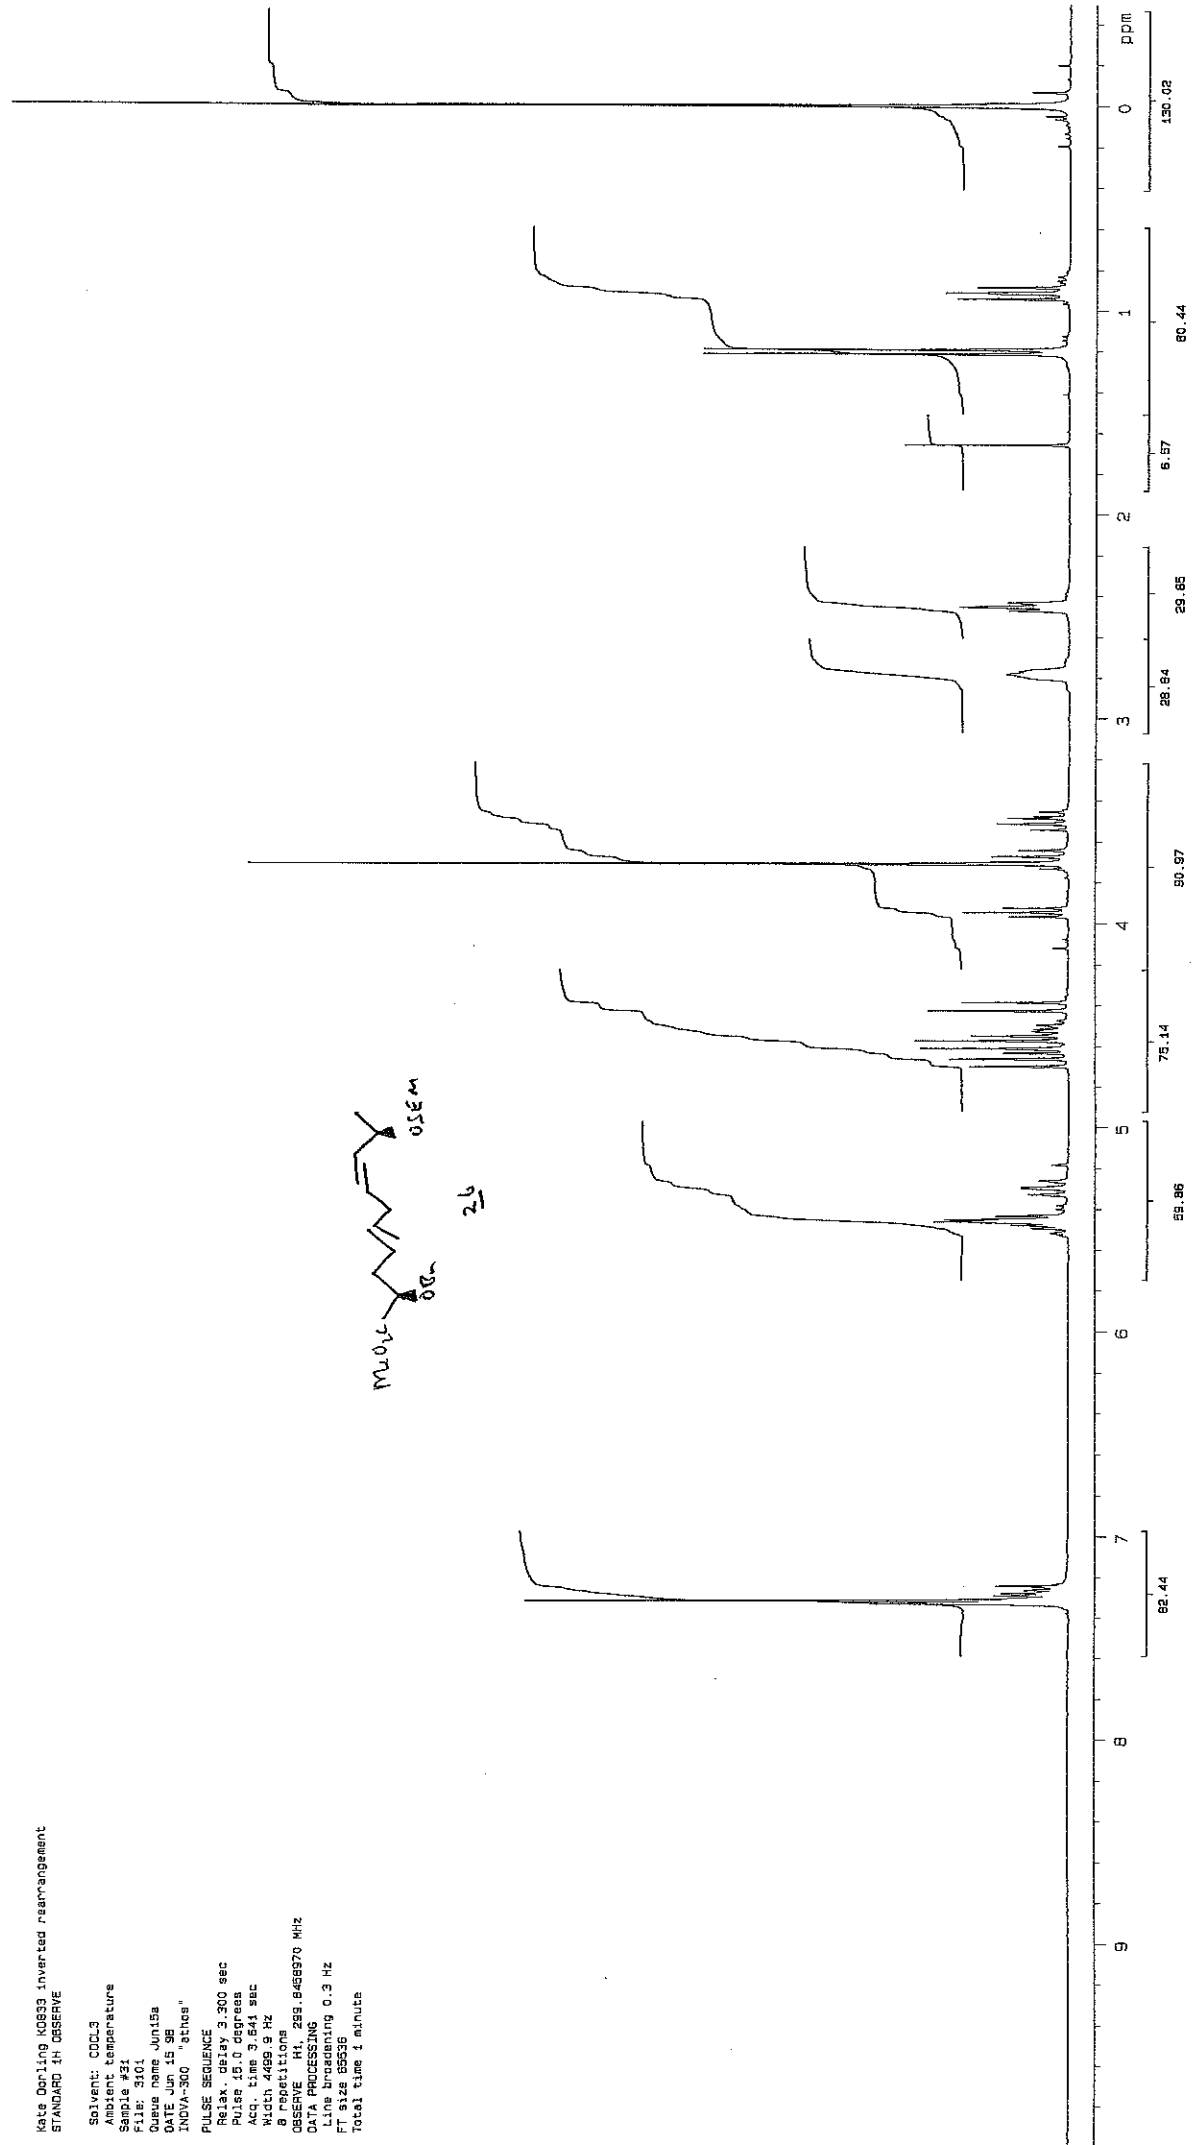

Kate Dooling 10833 inverted rearrangement  
STANDARD 1H OBSERVE

Solvent: CDCl<sub>3</sub>  
Ambient temperature  
Sample #31  
File: 3102  
Date: June 15  
Time: 15:00  
INOVA-300 'actos'  
PULSE SEQUENCE  
Pulse 45.0 degrees  
Acq. time 1.538 sec  
Width 20000.0 Hz  
840 repetitions  
OBSERVE CH: 75.3083144 MHz  
OBSERVE P1: 299.6473765 MHz  
P1: 40 dB  
Continuously on  
WALTZ-16 Modulated  
DATA PROCESSING  
Line broadening 1.0 Hz  
FT size 65536  
Total time 17 minutes

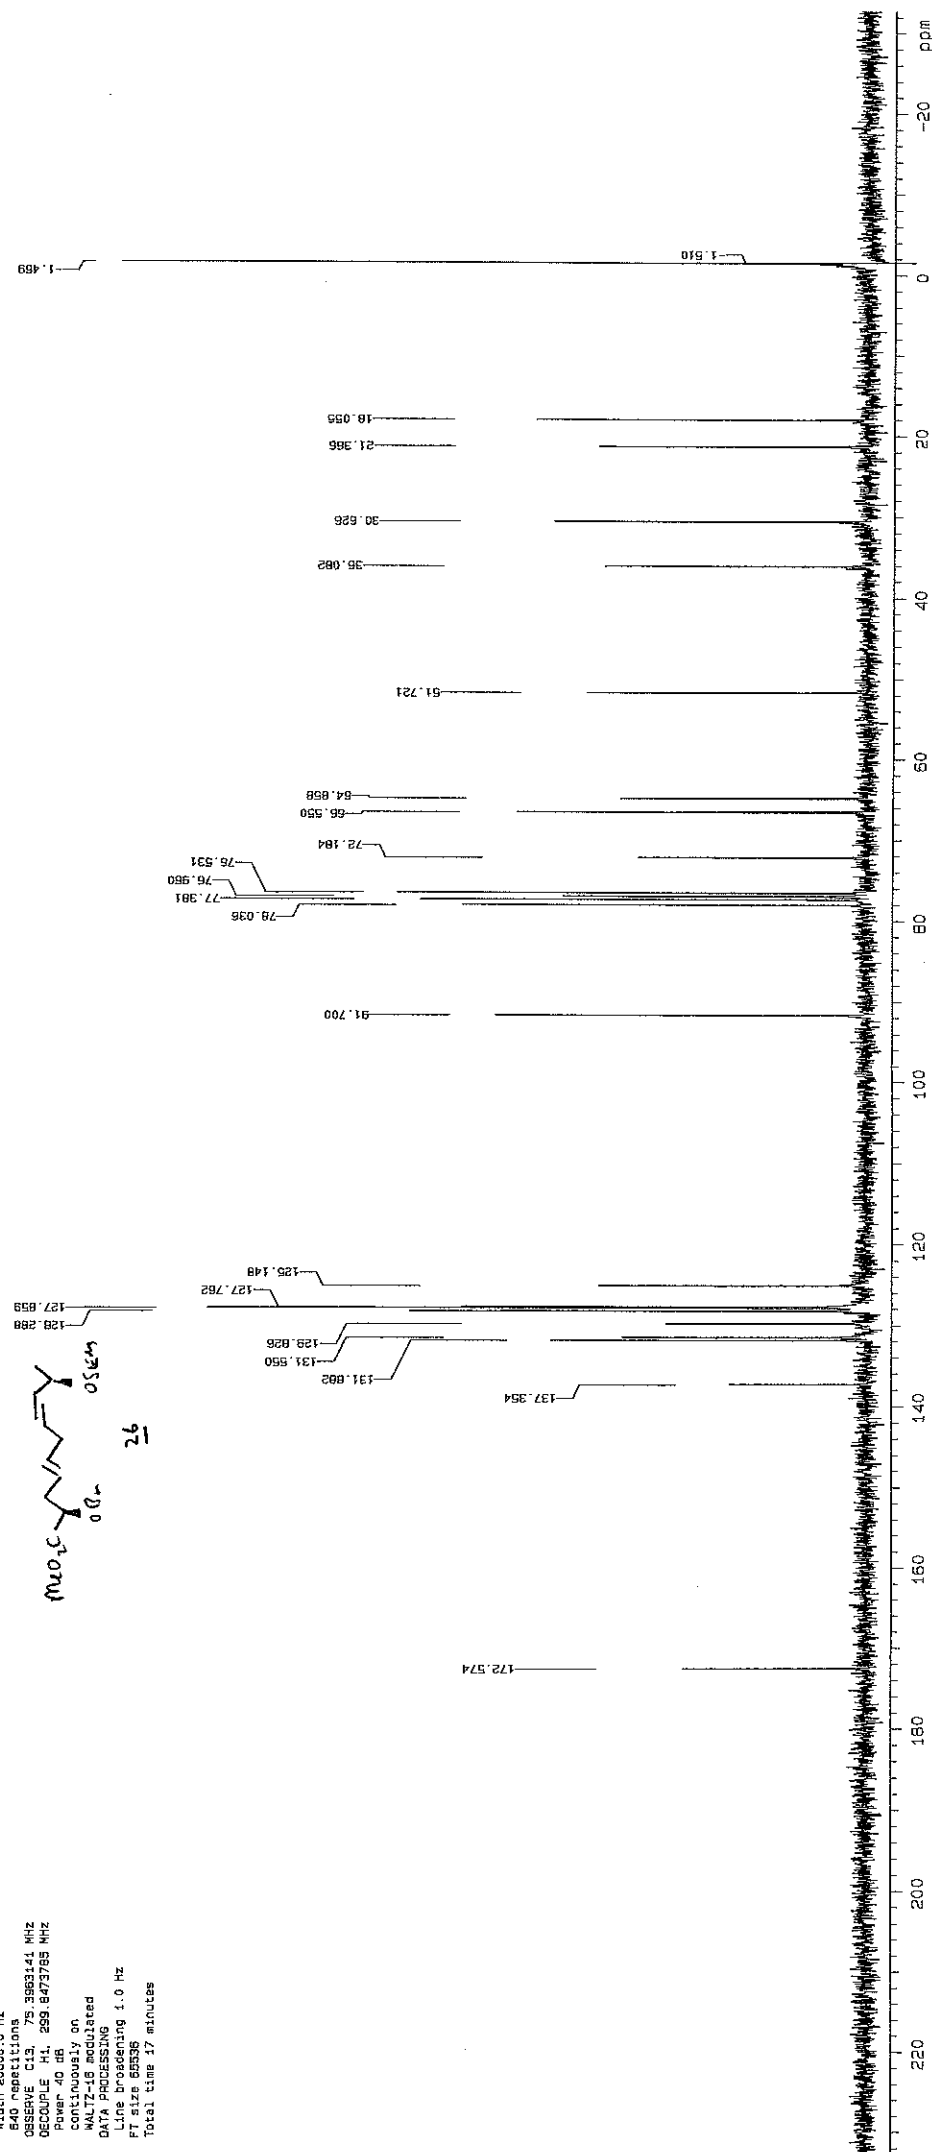

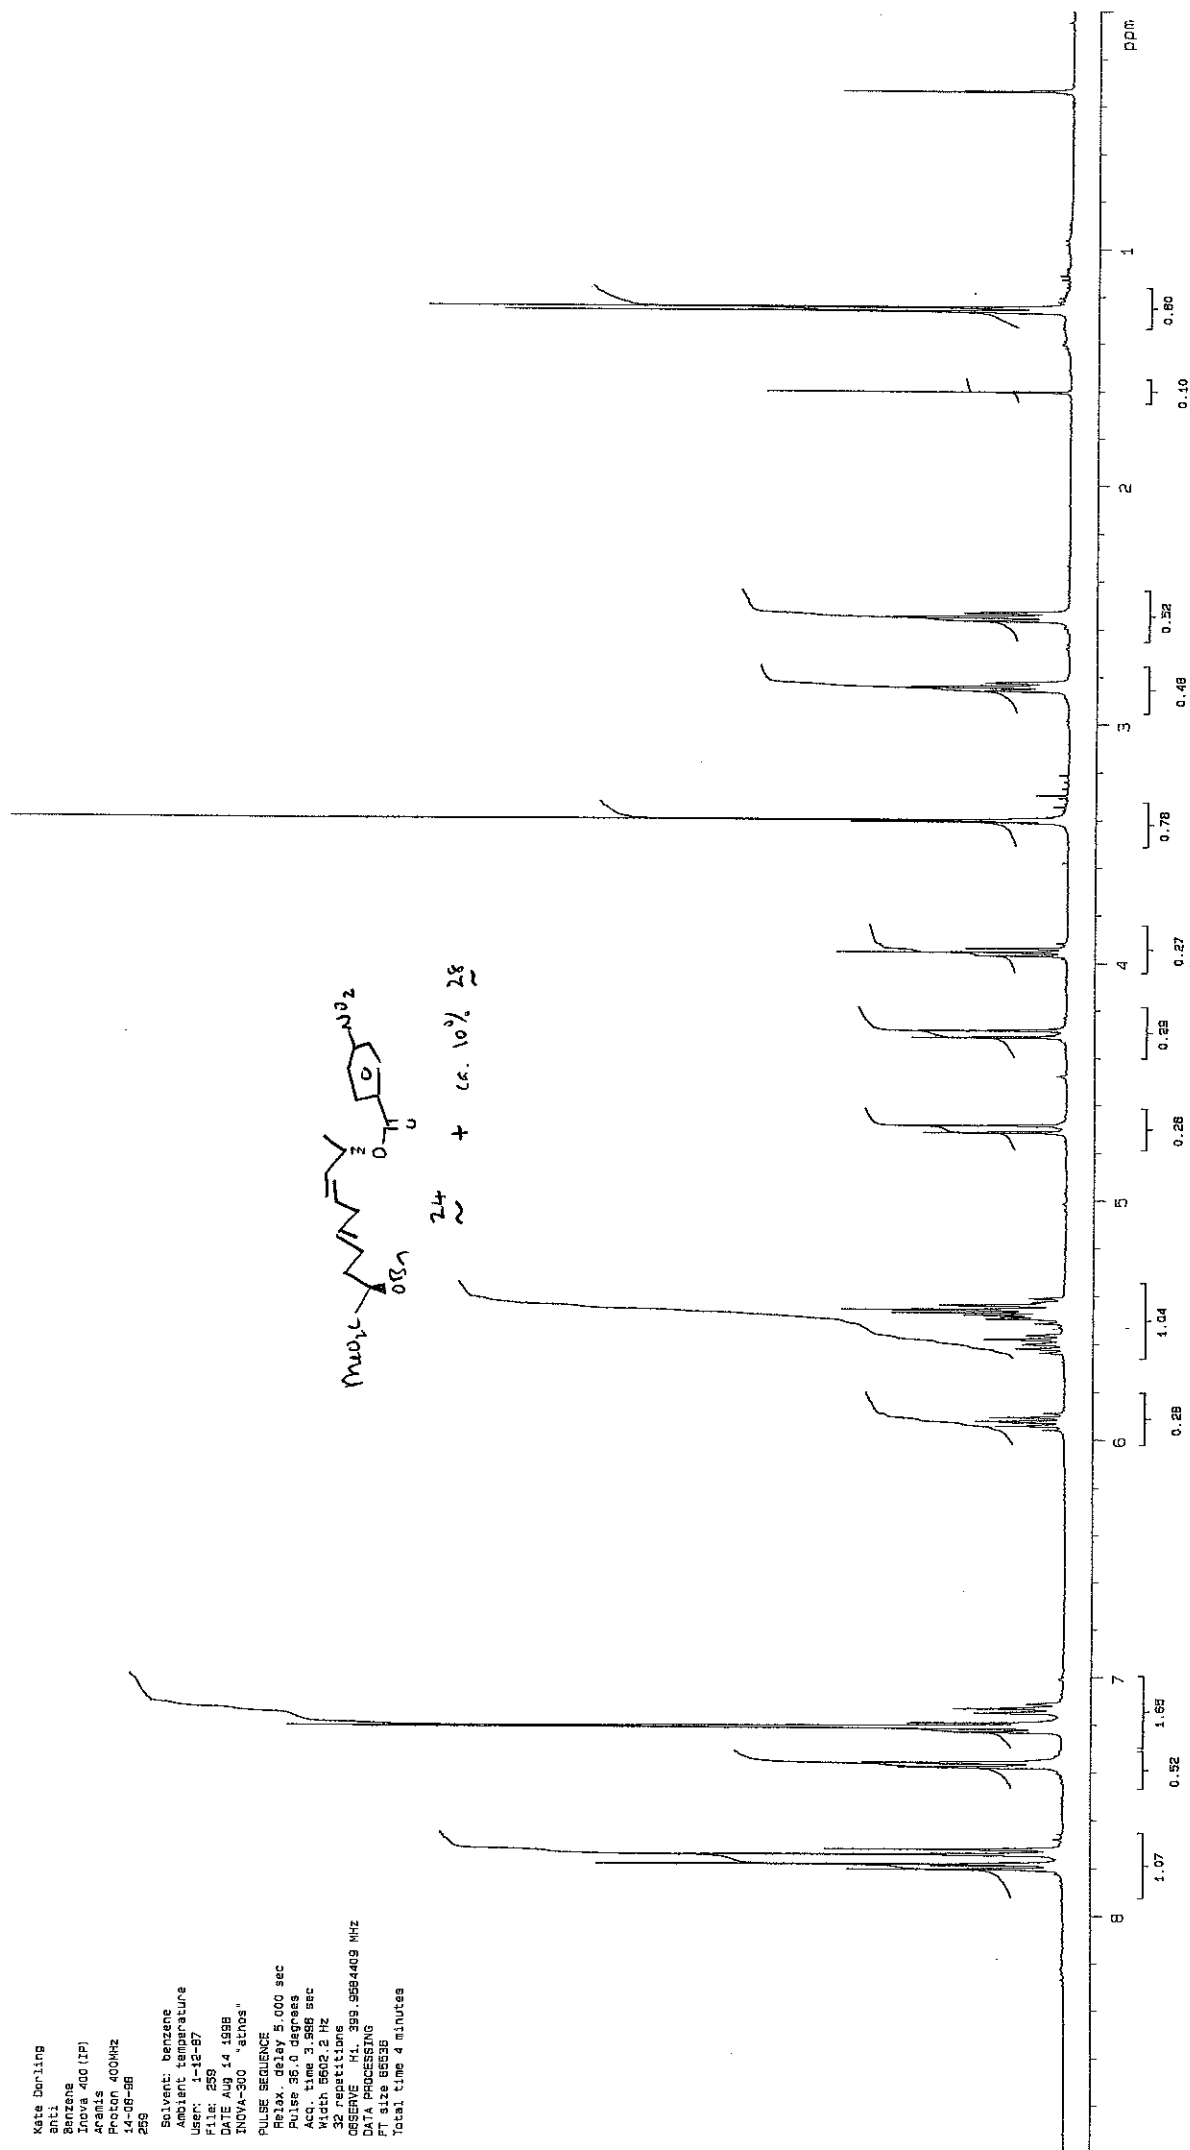

Kate Darling  
anti  
Benzene  
Inova 400 (IP)  
Aramis  
Proton 400MHz  
14-06-96  
259  
Solvent: benzene  
Ambient temperature  
User: 1-12-97  
File: 259  
DATE AUG 14 1998  
INOVA-300 "athos"  
PULSE SEQUENCE  
P1: 3.00 sec  
P2: 3.00 sec  
P3: 3.00 sec  
Acq. time 3.598 sec  
Width 8002.2 Hz  
32 repetitions  
OBSERVE M1 399.5594409 MHz  
DATA PROCESSING  
FT size 65536  
Total time 4 minutes

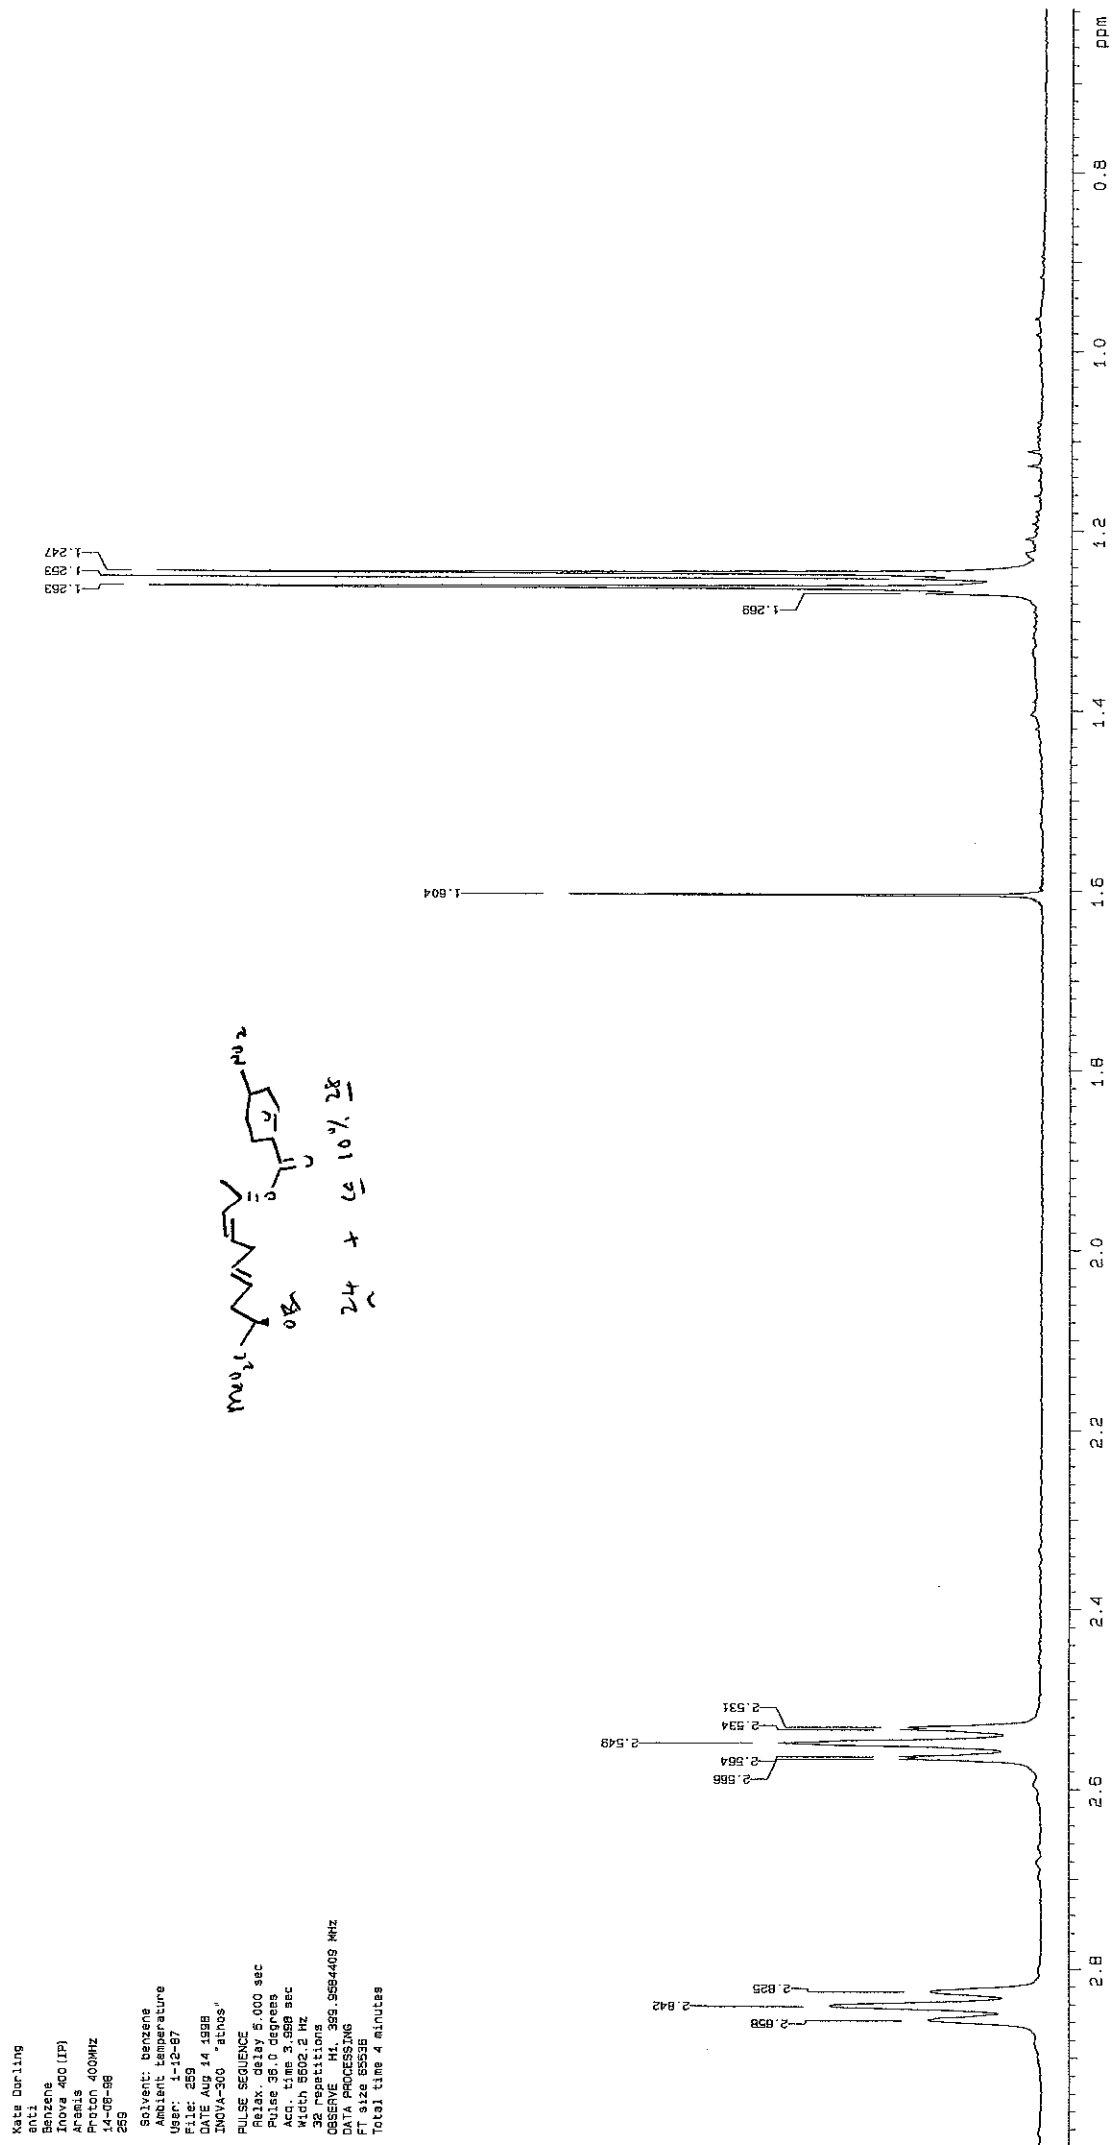

Kate Darling  
NMR  
Benzene  
Inova 400 (IP)  
Arenis  
Proton 400MHz  
14-DB-98  
259  
Solvent: benzene  
Acidic temperature  
Acidic 25-27  
Date: 259  
DATE AUG 14 1998  
INOVA-300 "athos"  
PULSE SEQUENCE  
Relax. delay 5.000 sec  
Pulse 35.0 degrees  
Acq. time 3.388 sec  
Meth 3002.2 Hz  
3000000000 Hz  
OBSERVE 1H1 399.959409 MHz  
DATA PROCESSING  
FT size 55336  
Total time 4 minutes

Kate Dorling KD797 Mitsunobu inversion  
13C OBSERVE

Solvent: CDCl3  
Ambient temperature  
Sample #24  
File: 2401  
Queue name Jun01b  
DATE Jun 1 98  
INOVA-300 "ethos"  
PULSE SEQUENCE  
Pulse 45.0 degrees  
Acq. time 1.438 sec  
Width 20000.0 Hz  
400 repetitions  
OBSERVE C13, 75.3963141 MHz  
DECOUPLE H1, 299.8473785 MHz  
Power 40 dB  
continuously on  
WALTZ-16 modulated  
DATA PROCESSING  
Line broadening 1.0 Hz  
F1 size 65536  
Total time 10 minutes

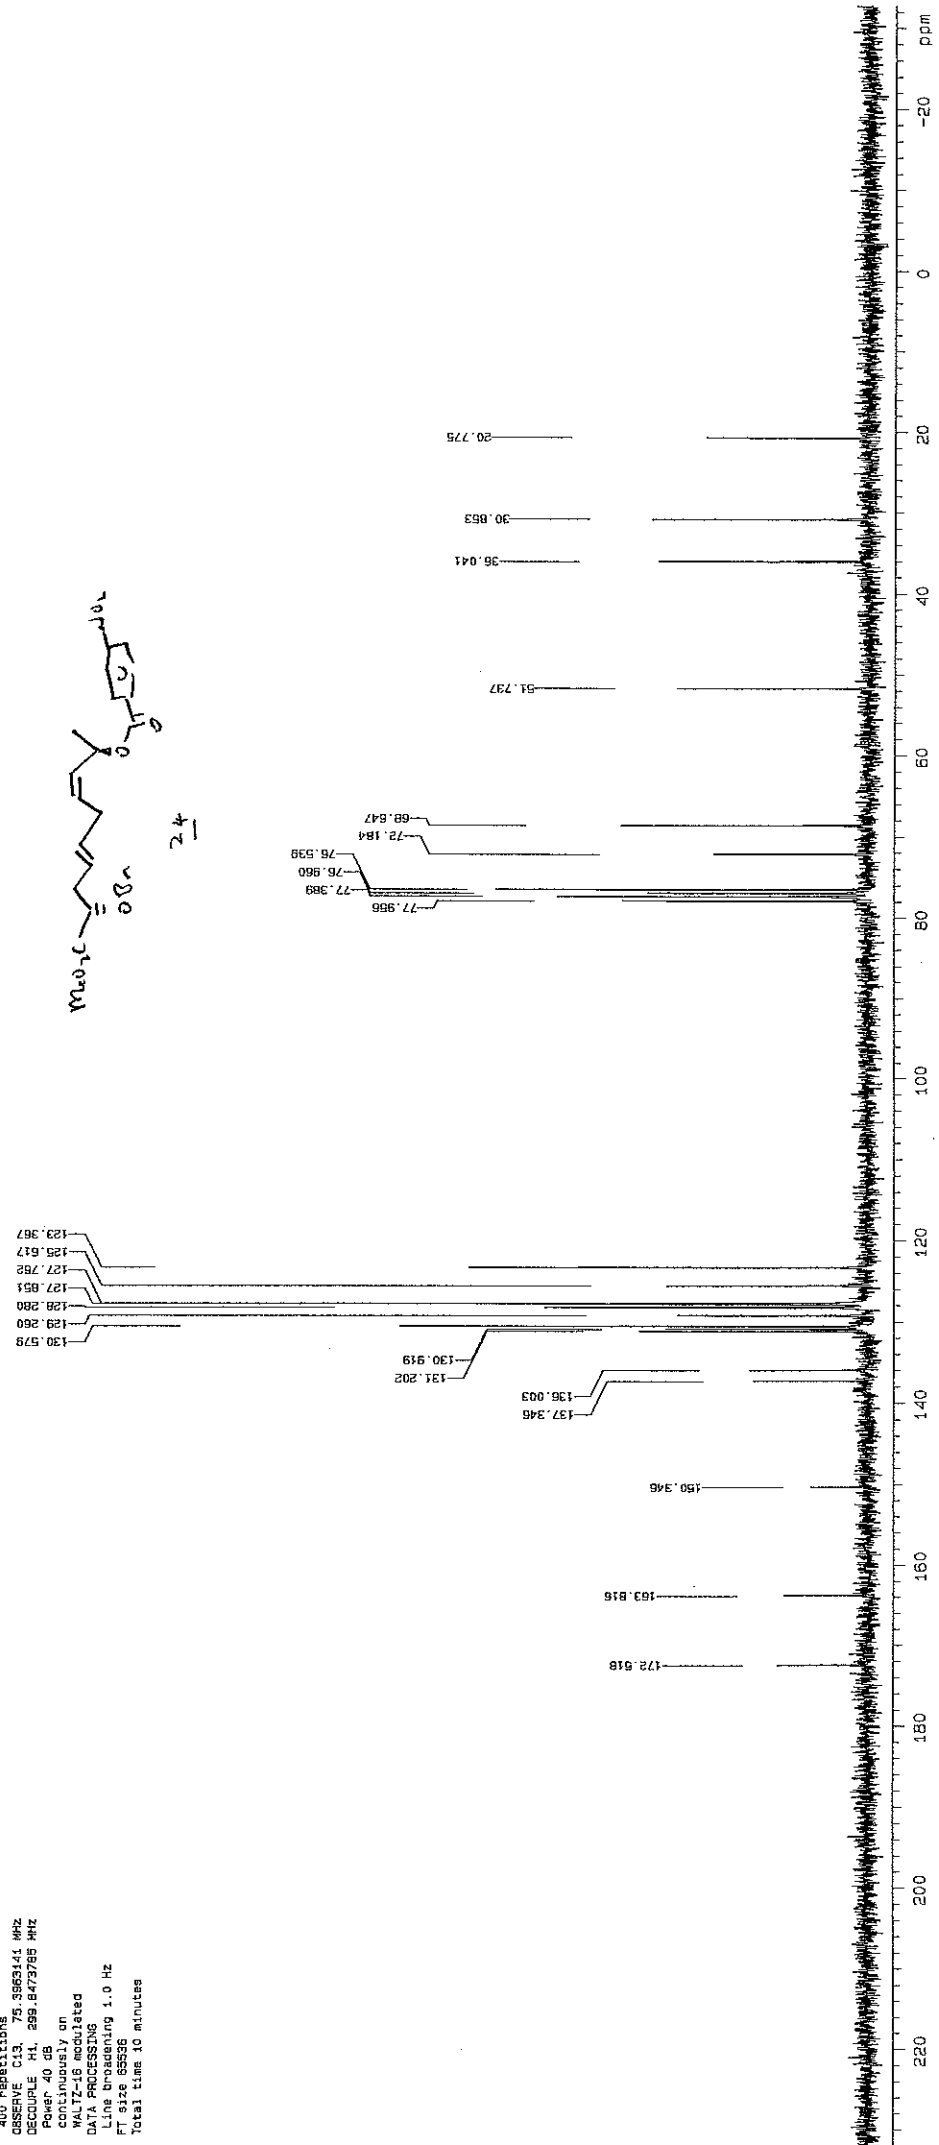

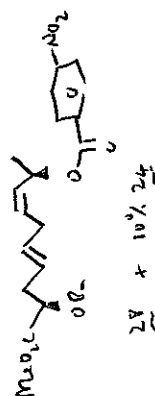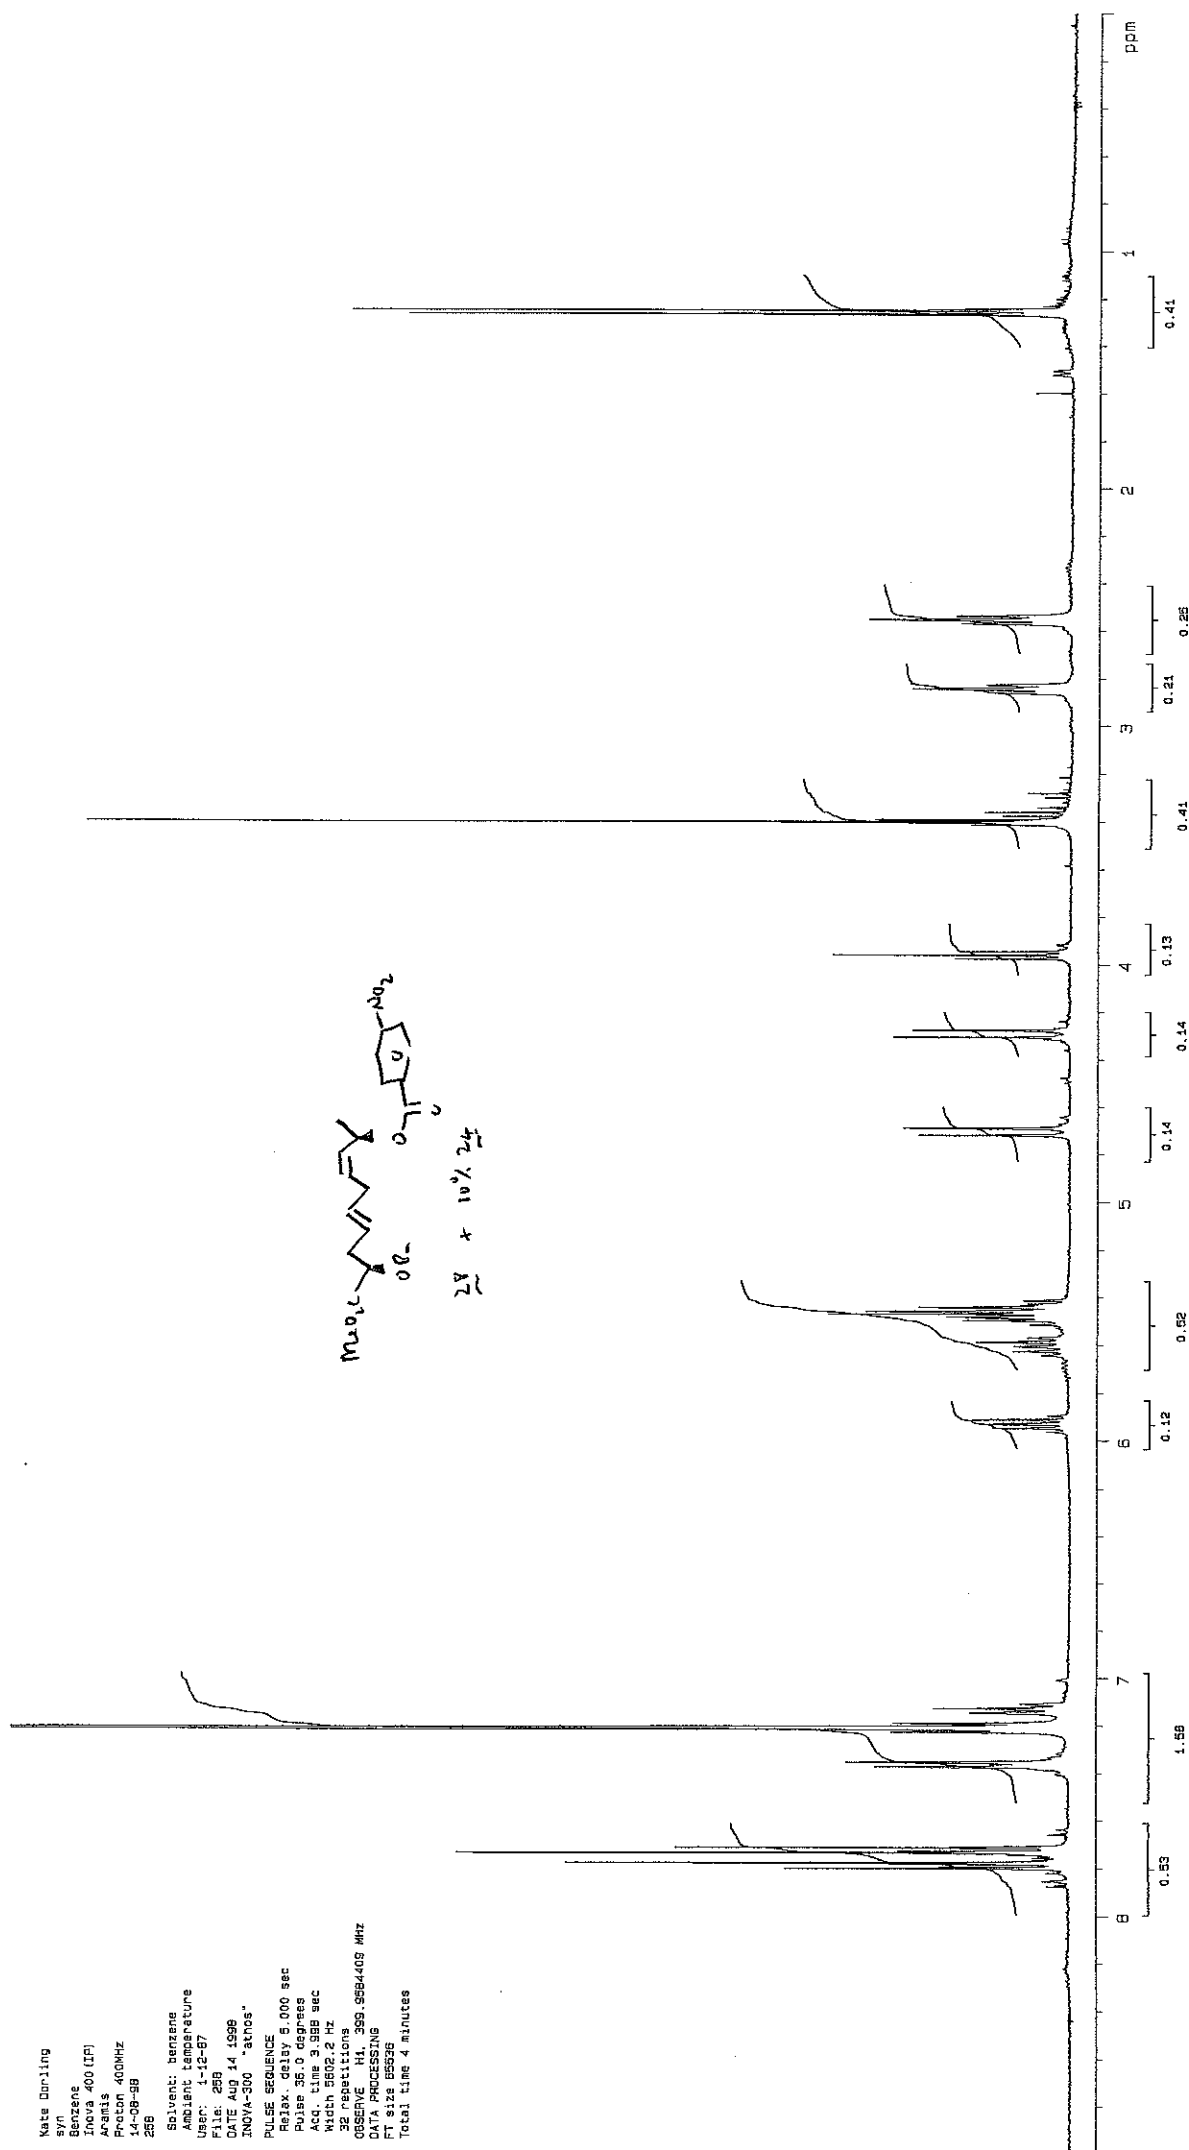





NO 788  
13C OBSERVE

Solvent: CDCl<sub>3</sub>  
Ambient temperature  
Sample #1  
File: 101  
Queue name Jun02b  
DATE JUN 2 98  
INNOVA-300 "athos"  
PULSE SEQUENCE  
Pulpr 45.0 degrees  
Acq. time 1.538 sec  
Width 20000.0 Hz  
544 repetitions  
OBSERVE C13, 75.3563141 MHz  
DECOUPLE H1, 285.8473785 MHz  
Power 40 dB  
continuously on  
WALTZ-16 modulated  
DATA PROCESSING  
Line broadening 1.0 Hz  
FI size 65536  
Total time 14 minutes

129.375  
129.817  
127.770  
127.867  
128.288  
129.243  
130.587

77.947  
77.397  
76.976  
76.547  
72.182  
58.647

137.338  
136.003  
131.219  
130.935

150.346  
163.832  
172.534

20.775  
30.877  
36.049

51.745

0.951

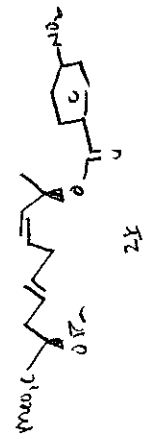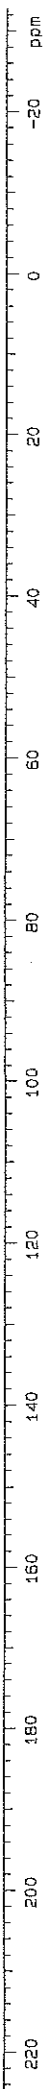

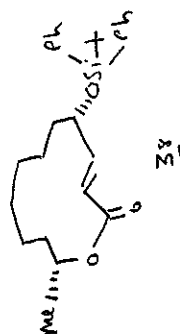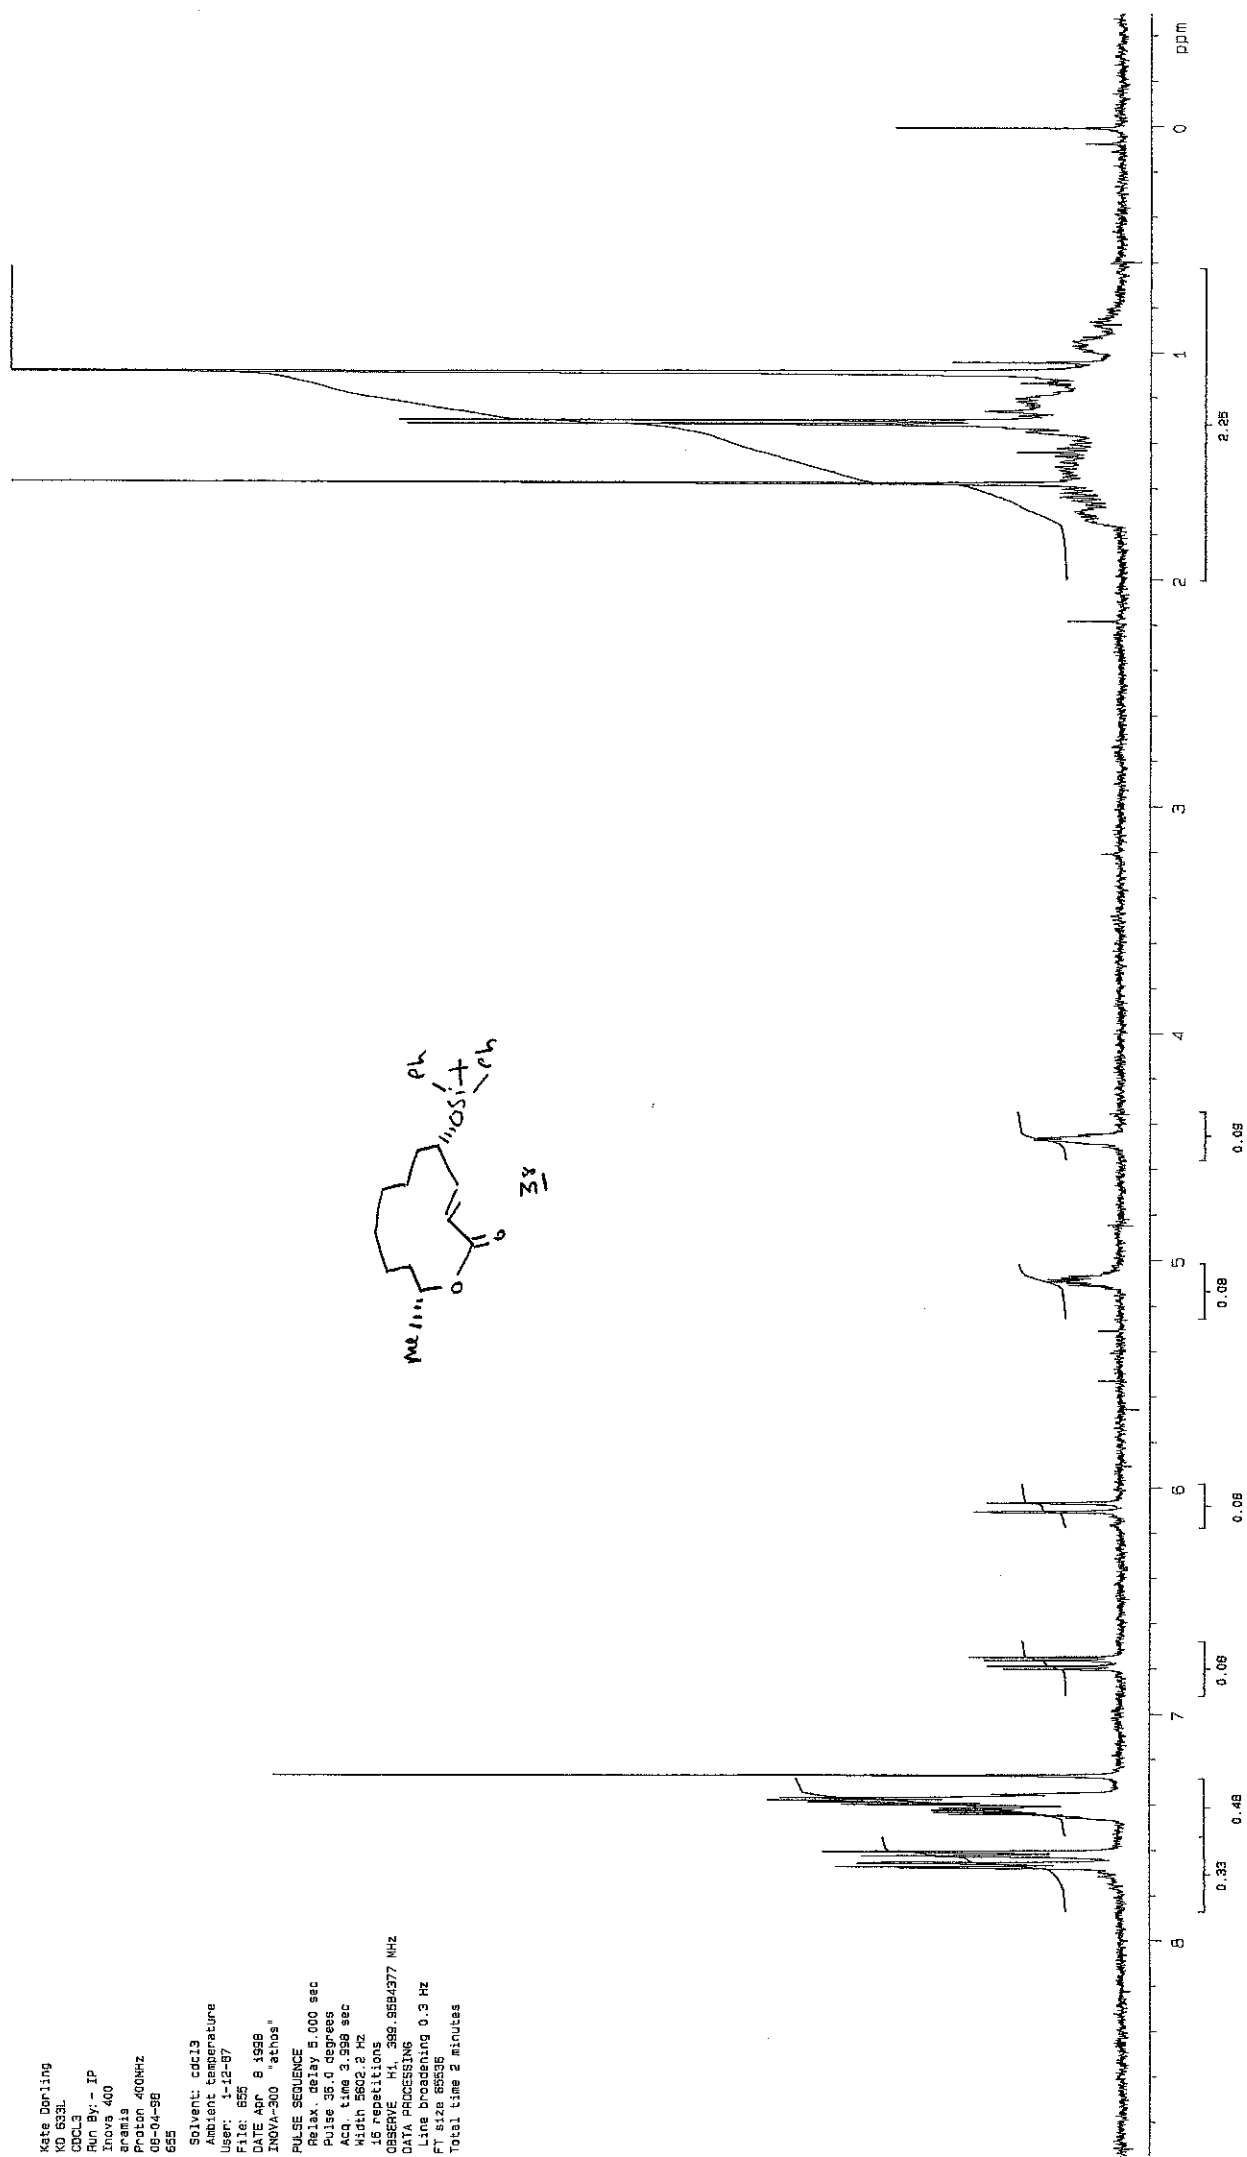

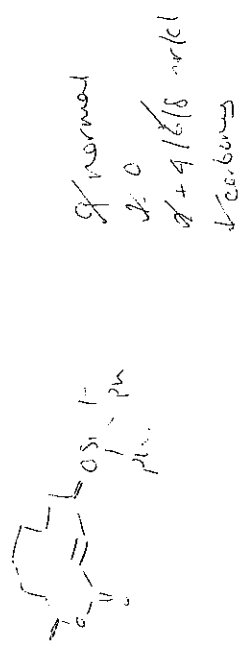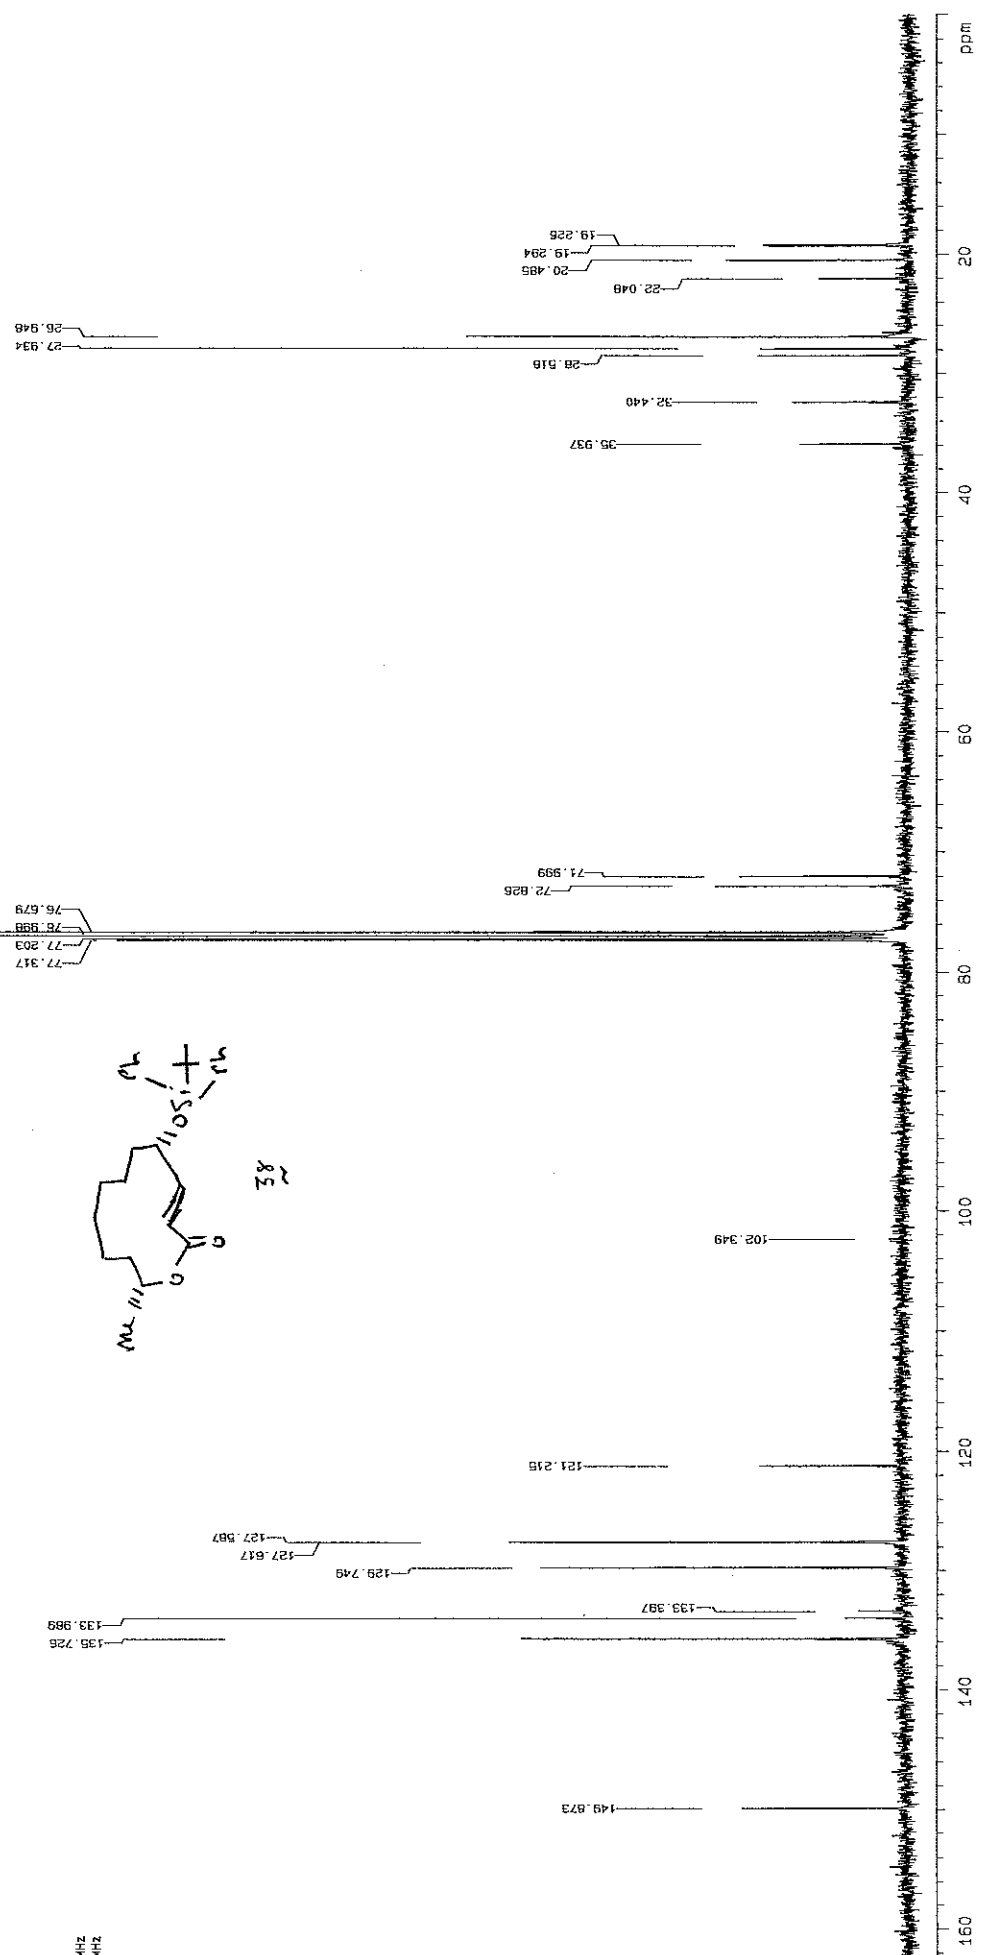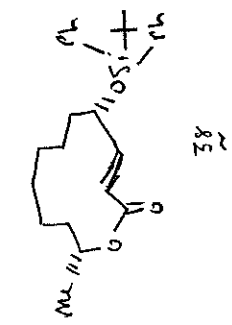

Kate Dorling  
KD 533L  
C00L3  
Run By: - IP  
Inova 400  
araris  
13C 100MHz  
08-04-98  
855C  
Solvent: cdcl3  
Ambient temperature  
File: 655  
DATE Apr 8 1998  
INVA-300 "athos"  
PULSE SEQUENCE  
Pulse 36.0 degrees  
Acq. time 1.000 sec  
Width 25000.0 Hz  
5913 repetitions  
OBSERVE C13 100.626302 MHz  
DECOUPLE H1 399.957748 MHz  
Power 35 dB  
continuously on  
WALTZ-16 modulated  
DATA PROCESSING  
Line broadening 1.0 Hz  
File size 65256  
Total time 18.4 hours

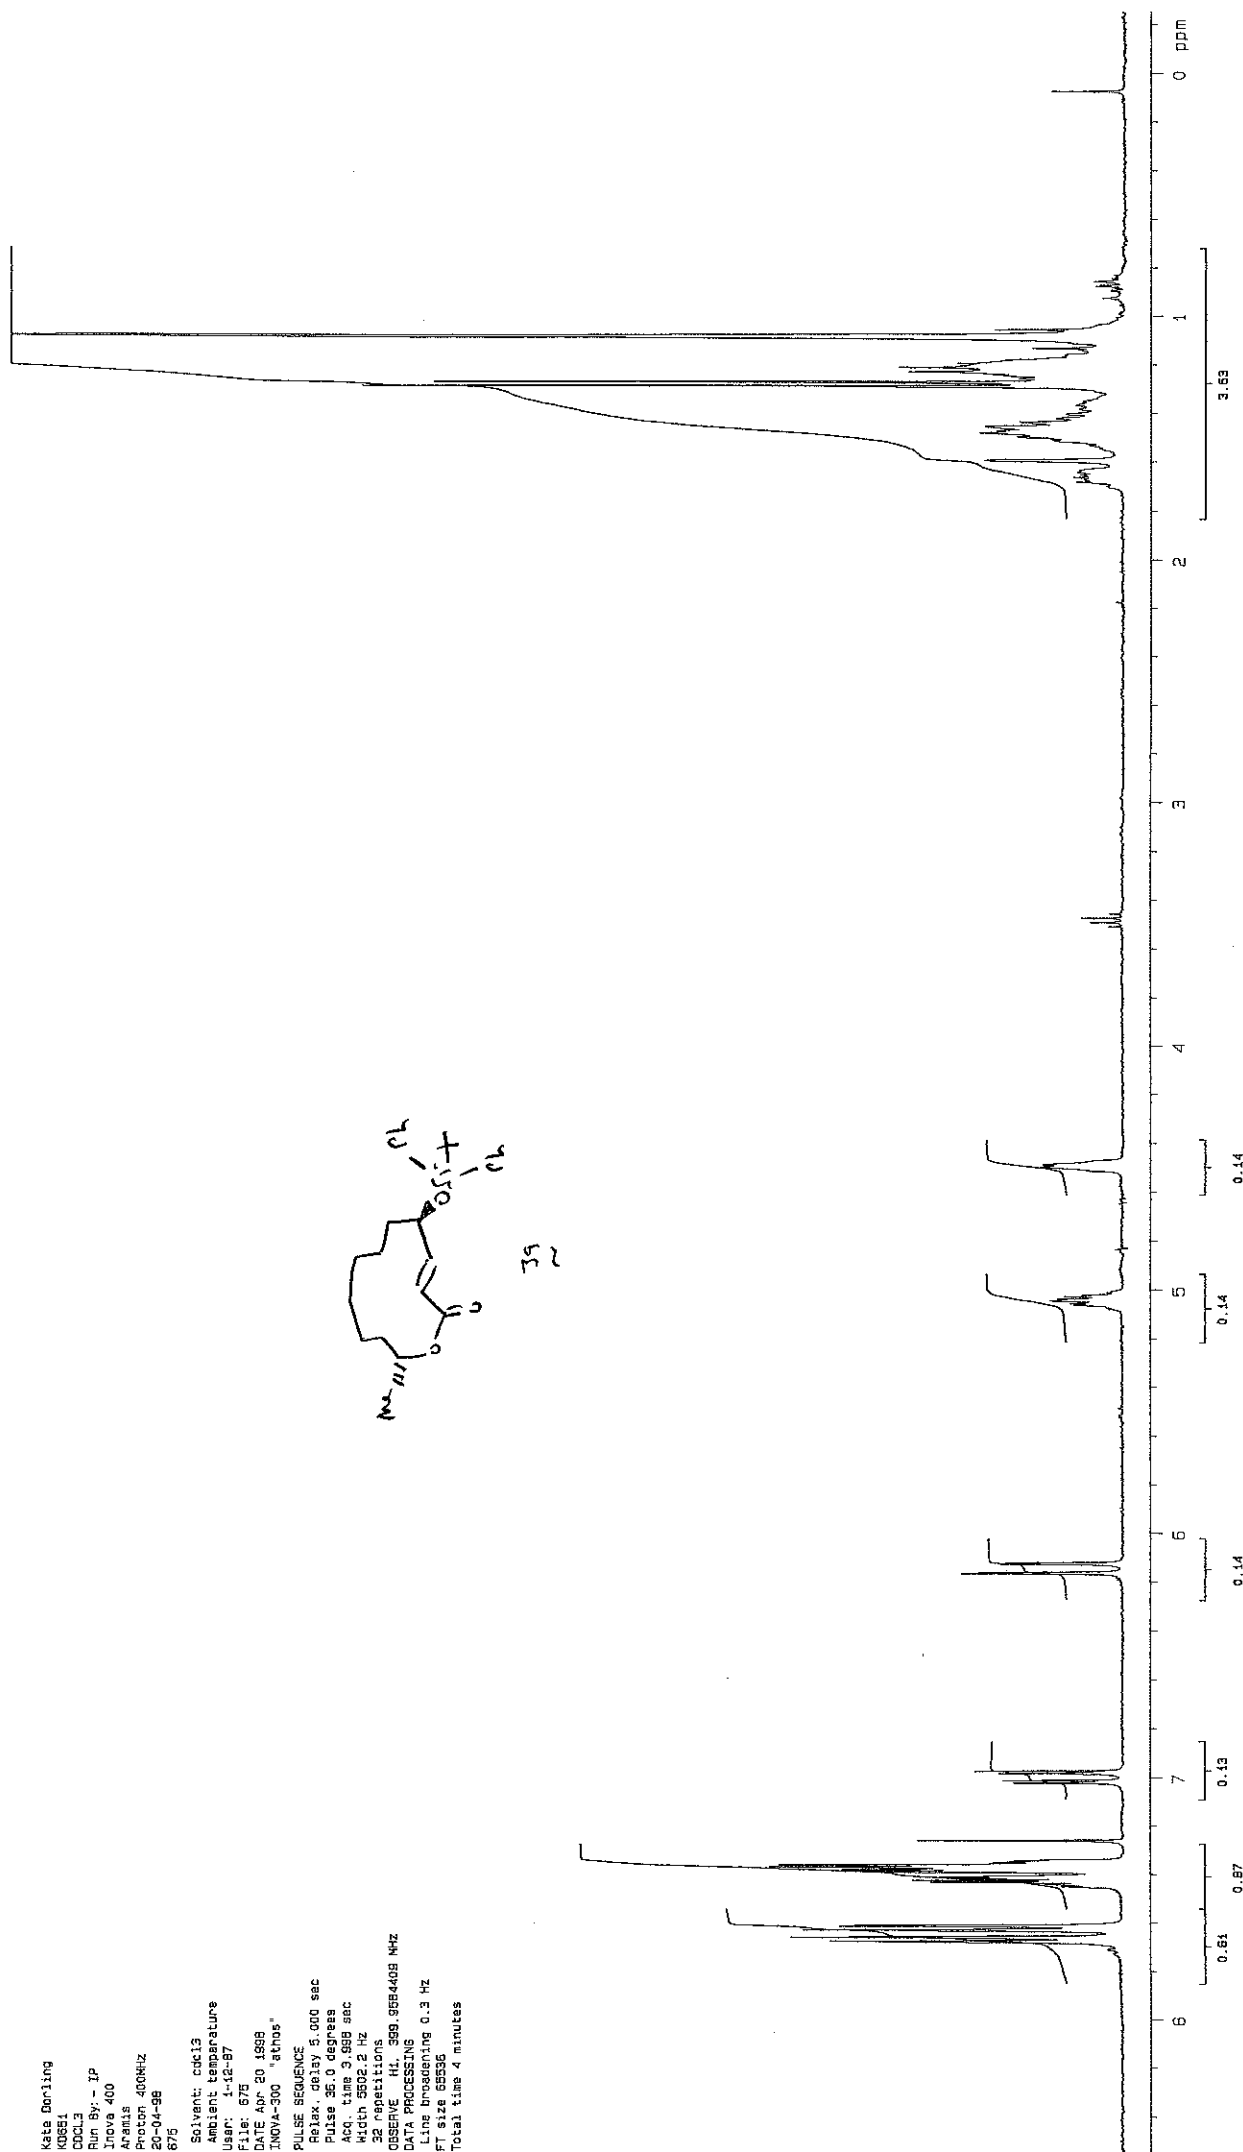

Kate Dorling  
K0851  
CDCl<sub>3</sub>  
Run By - IP  
Inova 400  
Aramis  
Proton 400MHz  
20-04-98  
675  
Solvent: cdcl3  
Ambient temperature  
User: 12-12-97  
File: 675  
DATE Acq 20 1998  
INOVA-300 "atmos"  
PULSE SEQUENCE  
Relax. delay 5.000 sec  
Pulse 35.0 degrees  
Acq. time 3.698 sec  
Width 5502.2 Hz  
32 repetitions  
OBSERVE H1 399.965408 MHz  
DATA PROCESSING  
Line broadening 0.3 Hz  
FT size 65536  
Total time 4 minutes

Kata Dorling  
K0851  
CDCL3  
Run By: - IP  
Inova 400  
Araxis  
13C 100MHz  
20-04-98  
875C

Solvent: cdcl3  
Ambient temperature  
File: 875  
DATE: Apr 20 1998  
INNOVA-400 "Araxis"  
PULSE SEQUENCE  
Pulse 35.0 degrees  
Acq. time 1.000 sec  
Width 25000.0 Hz  
64000 repetitions  
OBSERVE C13, 100.5665302 MHz  
DECUPLE H1, 399.9957749 MHz  
Power 35 dB  
continuously on  
WALTZ-15 modulated  
DATA PROCESSING  
Line broadening 1.0 Hz  
FT size 65536  
Total time 17.8 hours

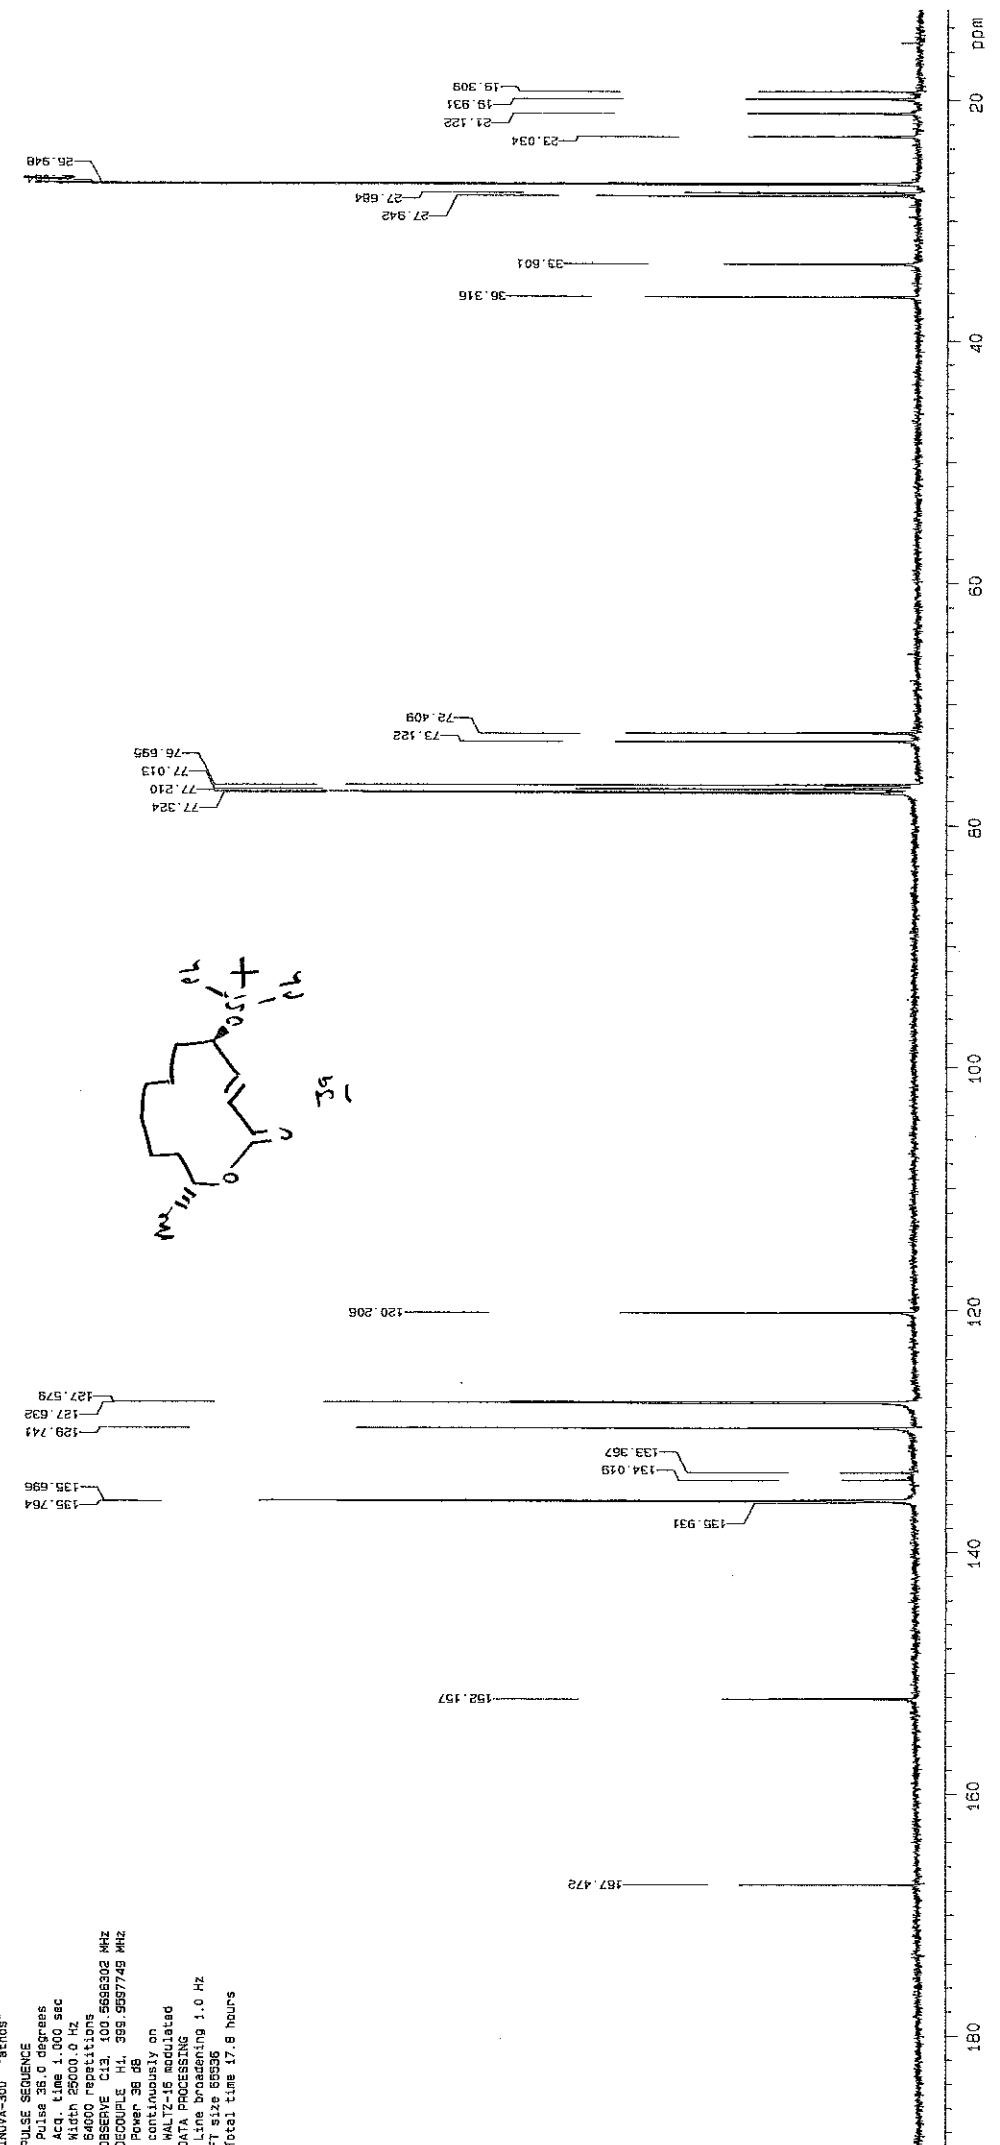

Kate Dorling patulolide C  
STANDARD 1H OBSERVE

Solvent: CDCl3  
Ambient temperature  
Sample #5  
File: 501  
Queue name Aug21a  
DATE Aug 21 98  
INOVA-300 "athos"  
PULSE SEQUENCE  
Relax. delay 3.300 sec  
Pulse 90.0 degrees  
Acq. time 3.641 sec  
Width 4499.9 Hz  
16 repetitions  
OBSERVE H1, 299.8458793 MHz  
DATA PROCESSING  
Line broadening 0.3 Hz  
FT size 65536  
Total time 1 minutes

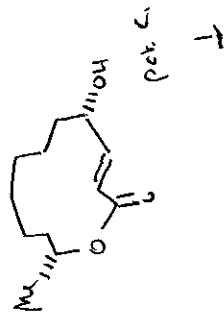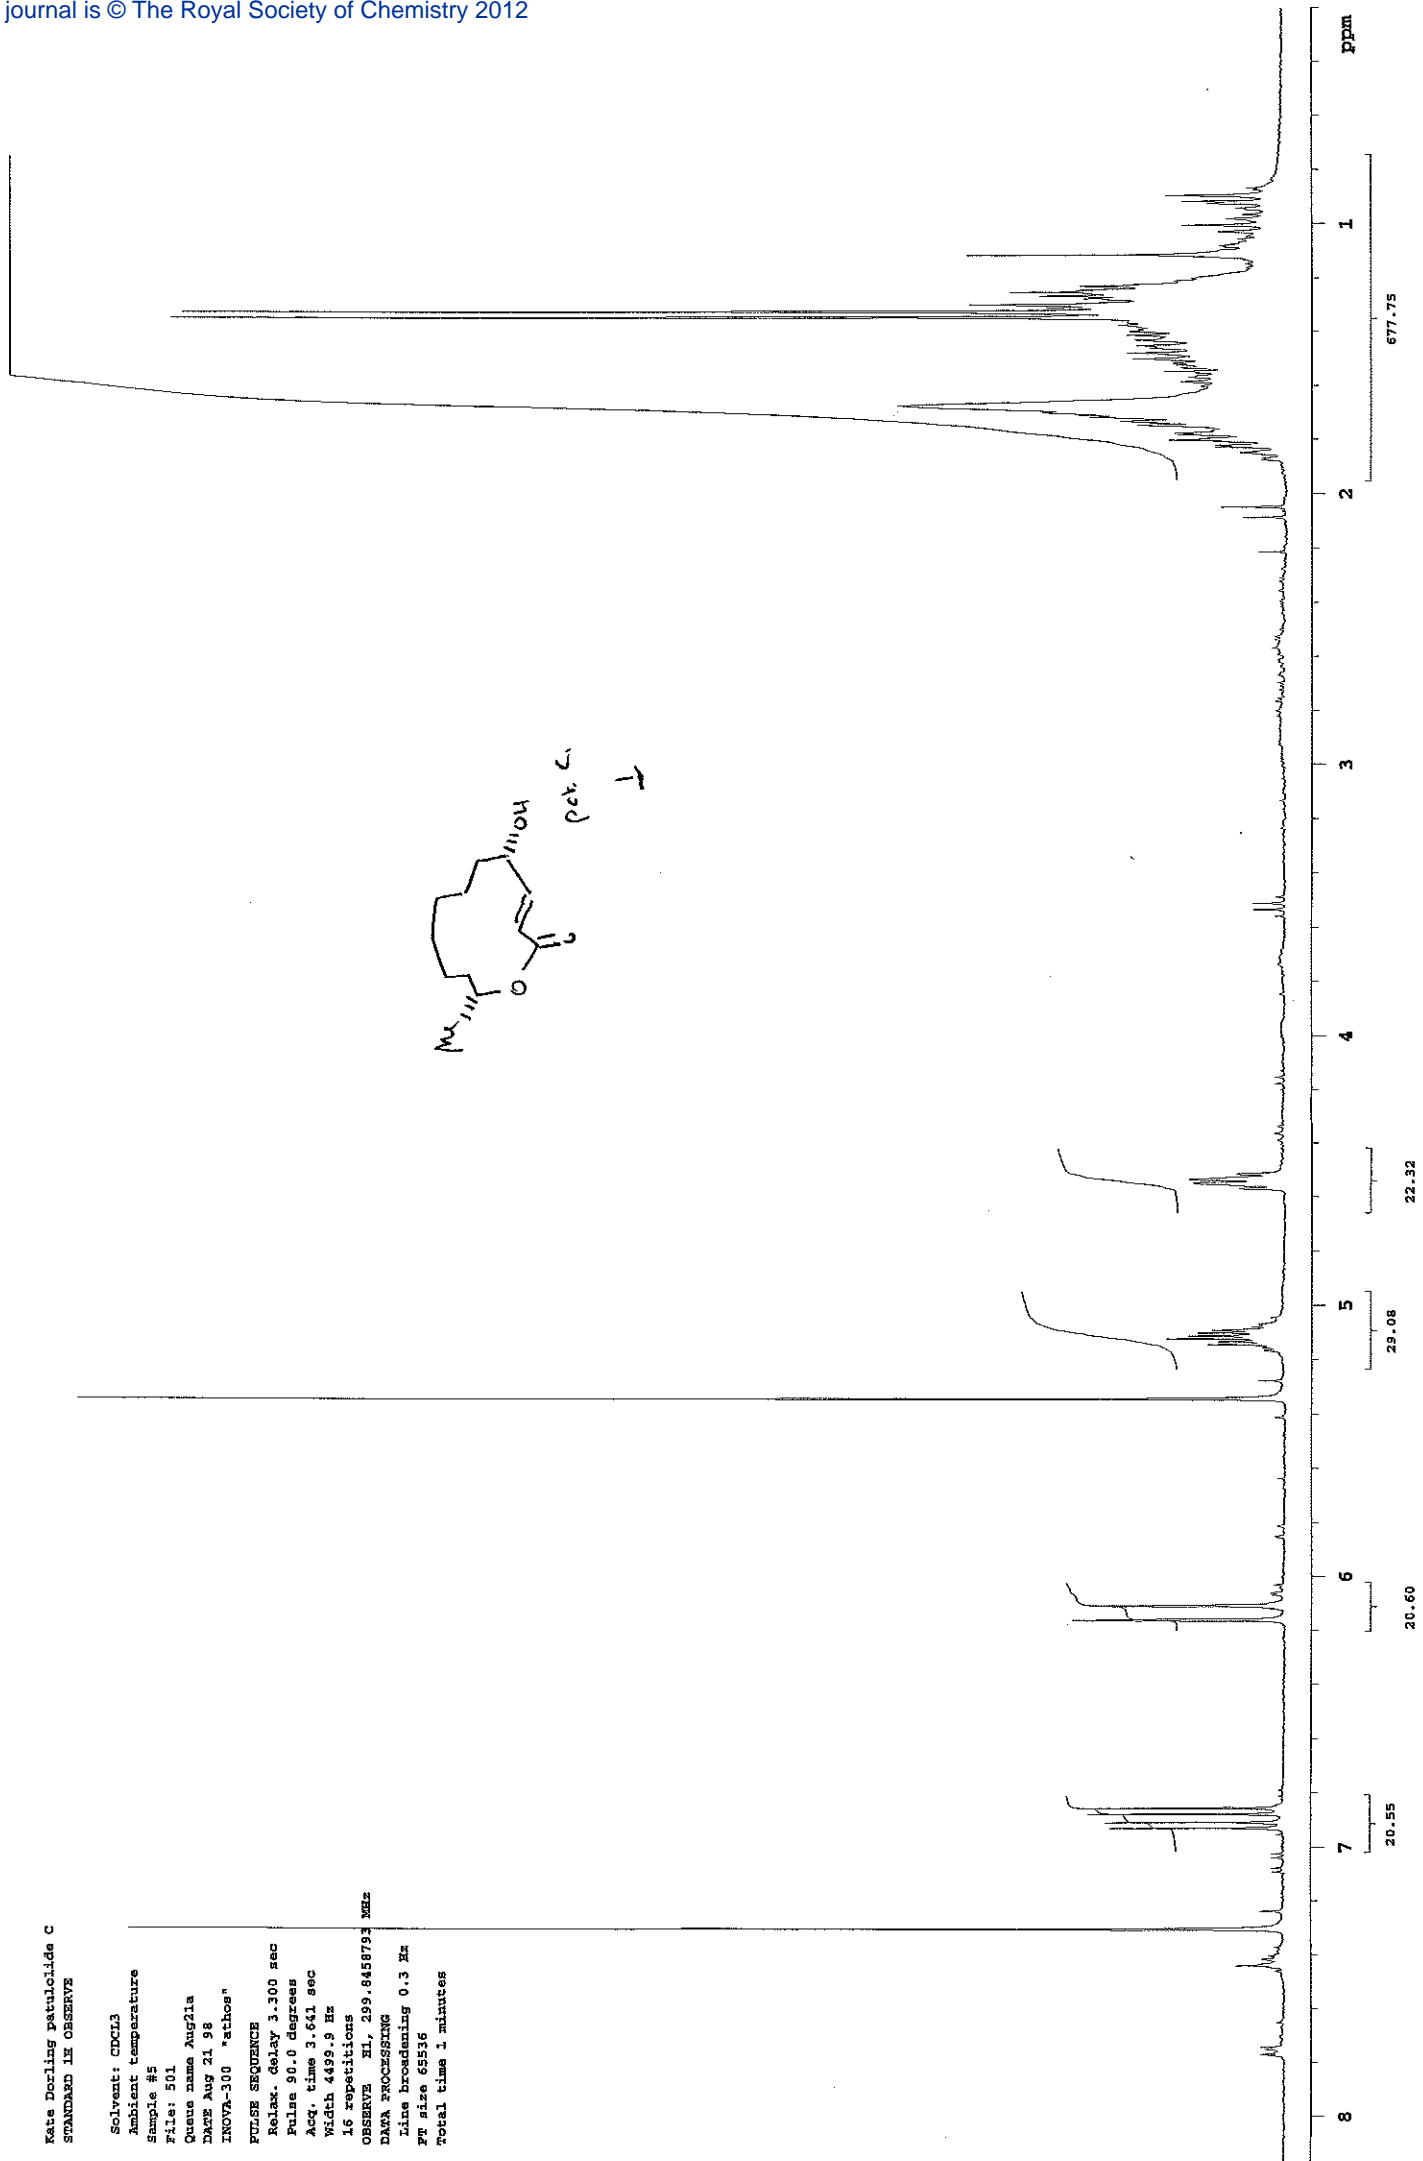

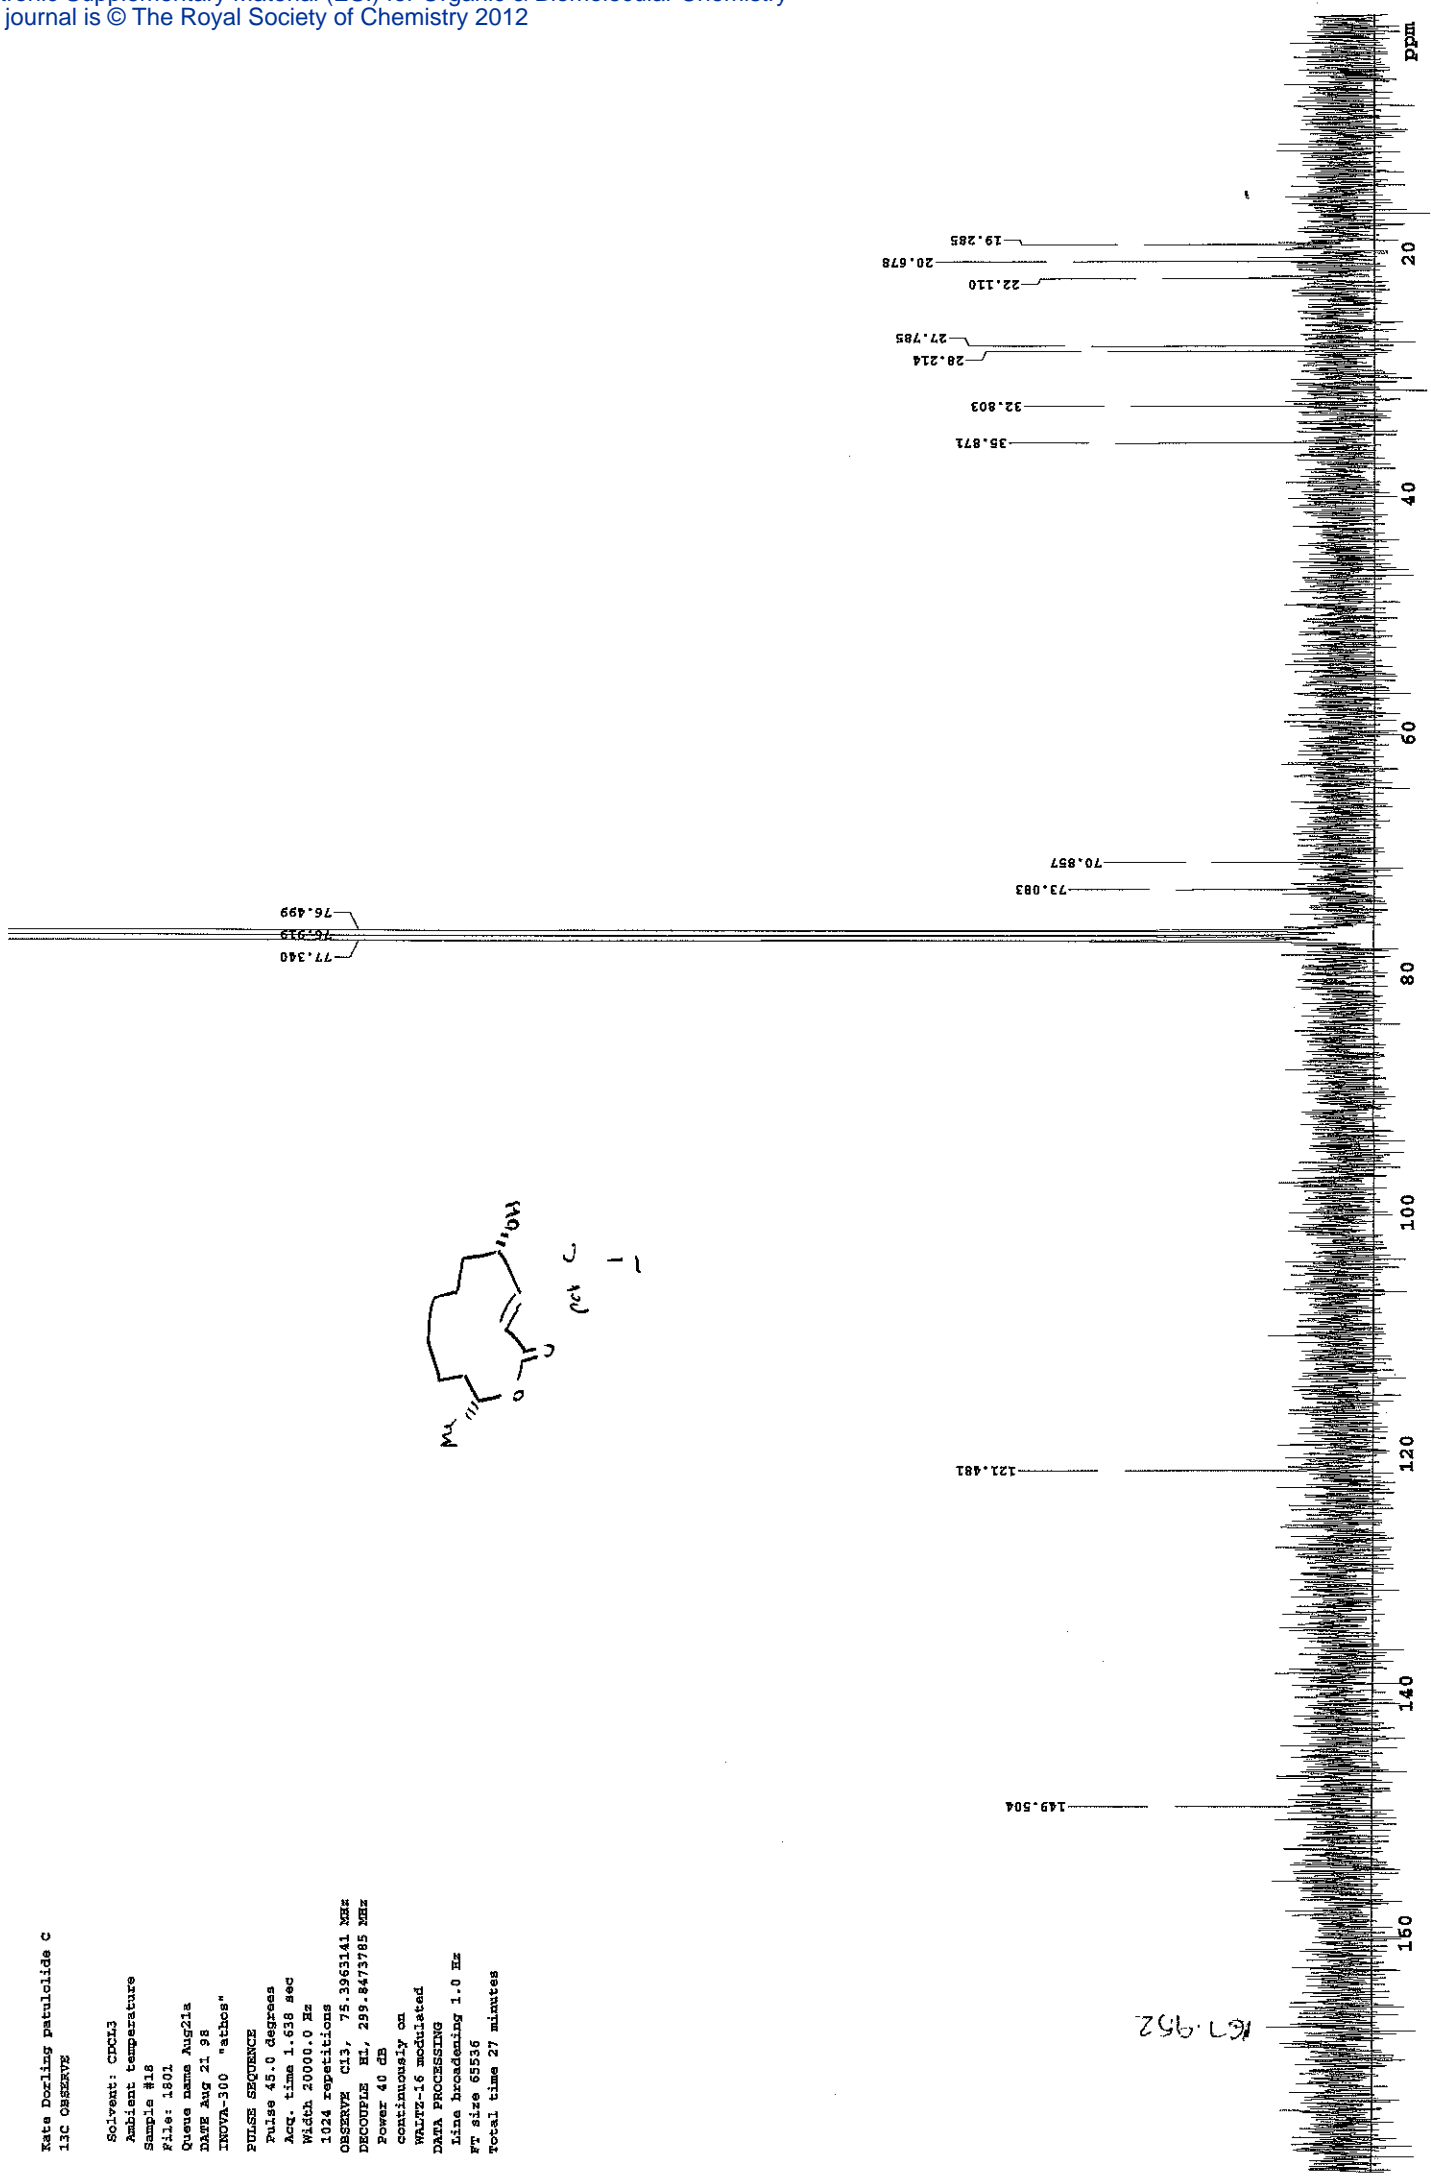

Kate Dorling patulolide C  
13C OBSERVE

Solvent: CDCl3  
Ambient temperature  
Sample #18  
File: 1801  
Queue name Aug21a  
DATE Aug 21 98  
INVT-300 "athos"

PULSE SEQUENCE  
Pulse 45.0 degrees  
Acq. time 1.638 sec  
Width 20000.0 Hz  
1024 repetitions  
OBSERVE C13, 75.3963141 MHz  
DECOUPLE H1, 299.8473785 MHz  
Power 40 dB  
continuously on

WALTZ-16 modulated  
DATA PROCESSING  
Line broadening 1.0 Hz  
FT size 65536  
Total time 27 minutes



Kate Dorling  
K0803  
CDCl3  
Run By: - IP  
Standard H-1 parameters  
5 mm PFG triple probe  
31-03-88  
485  
Solvent: cdcl3  
Ambient temperature  
User: 1-15-87  
File: 456  
DATE: Mar 31 95  
INQVA-300 "actos"  
PULSE SEQUENCE  
Relax. delay 5.000 sec  
Pulse 101.4 degrees  
Acq. time 4.000 sec  
Width 7000.4 Hz  
16 repetitions  
OBSERVE H1 459.8527844 MHz  
DATA PROCESSING  
Line broadening 0.3 Hz  
Ft size 85536  
Total time 2 minutes

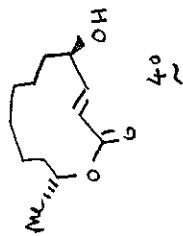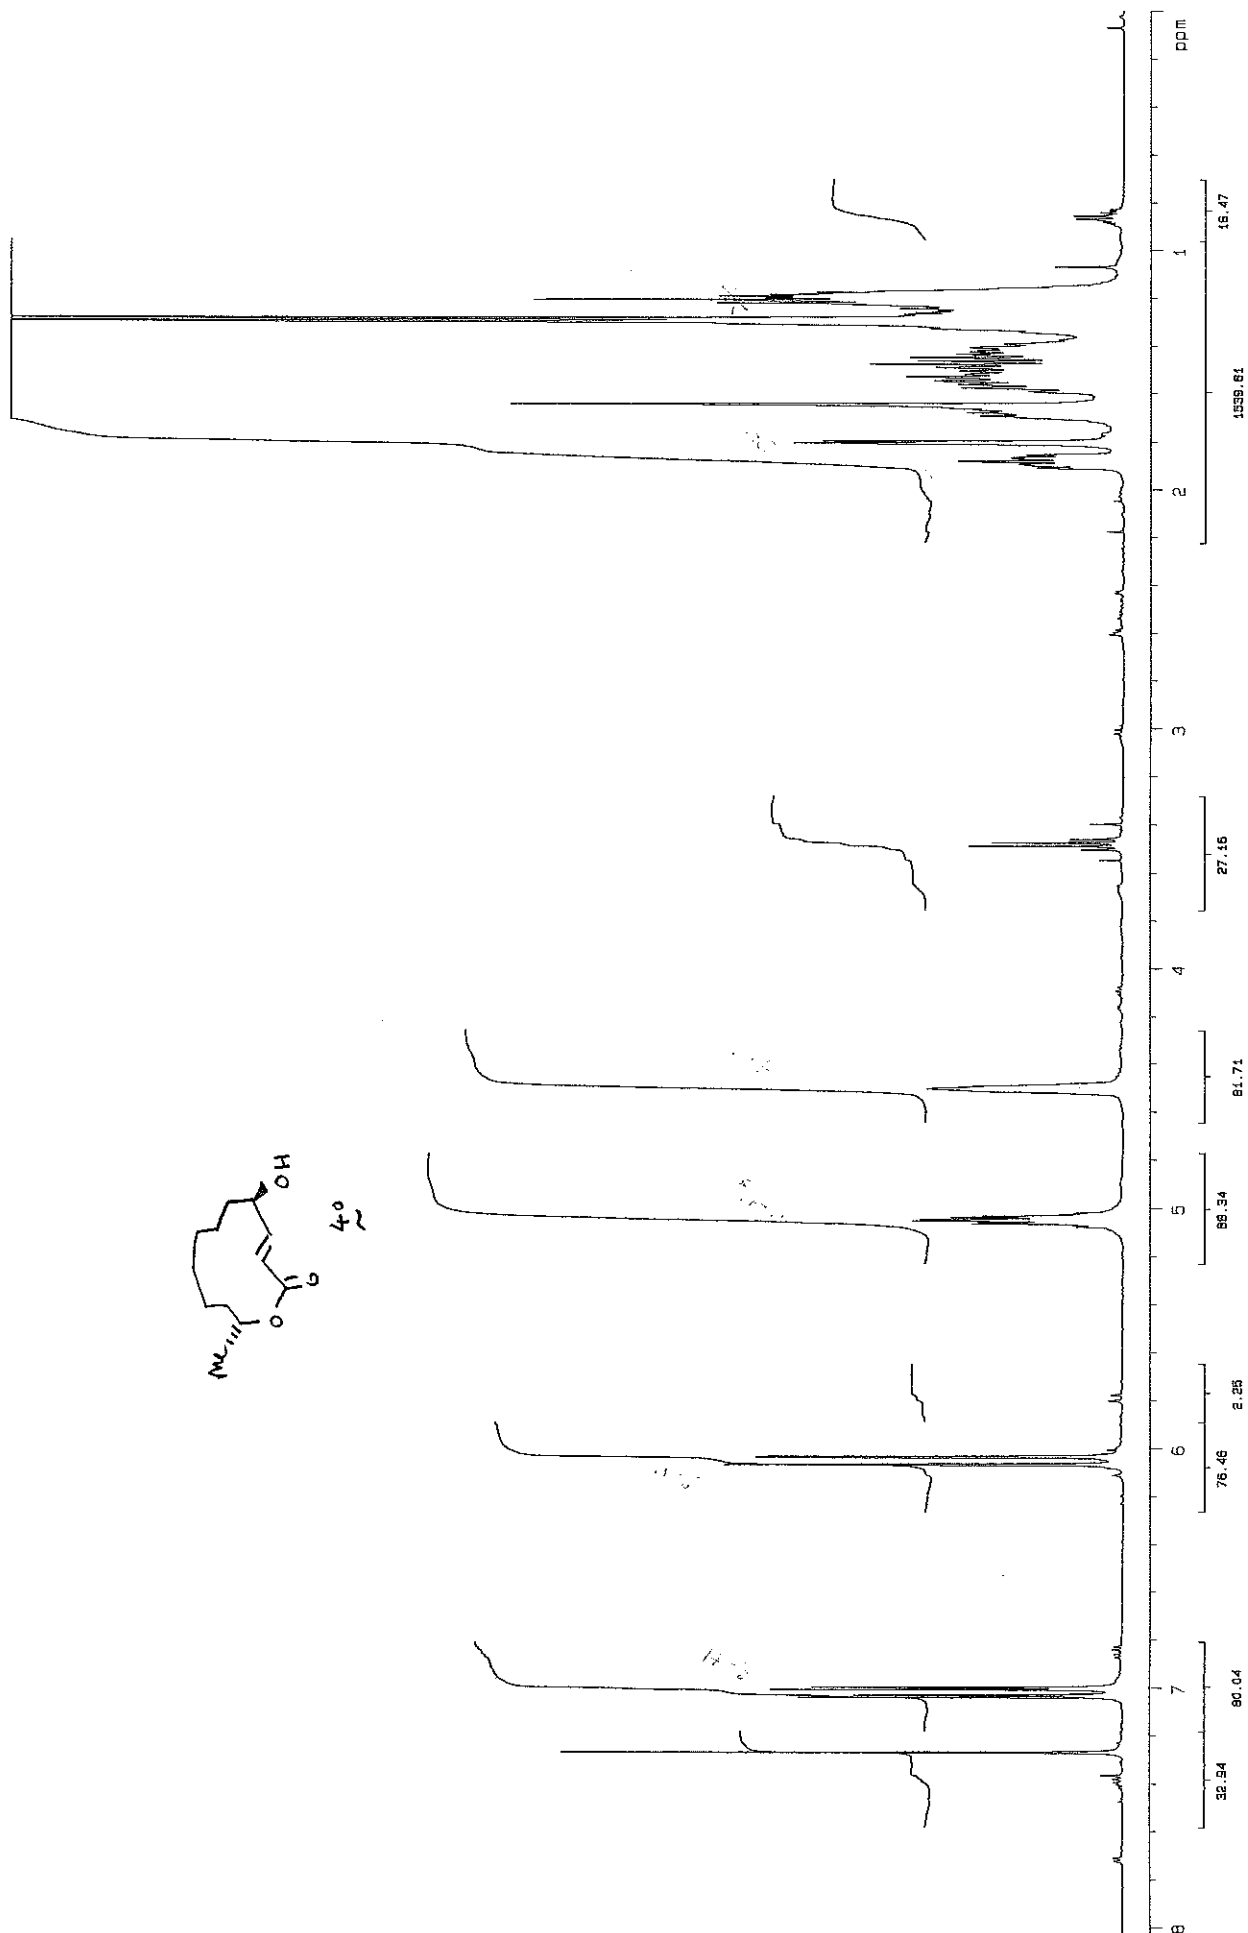

Solvent: cdc13  
Ambient temperature  
User: 1-15-87  
File: 456  
DATE Mar 31 98  
INNOV-300 "athos"

PULSE SEQUENCE  
Pulse 72.0 degrees  
Acq. time 1.005 sec  
Width 30007.5 Hz  
48464 repetitions  
JBSERVE C13, 125.6890854 MHz  
JCOUPLE H1, 499.9545391 MHz

Power 44 dB  
continuously on  
WALTZ-15 modulated  
DATA PROCESSING  
Line broadening 3.0 Hz  
Tone 65535  
Total time 13.5 hours.

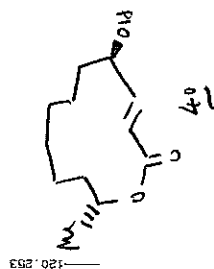

K. Dorling  
KD469  
cdc13  
375  
U-500 (HF)  
14.7.97

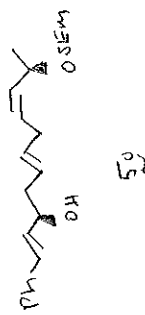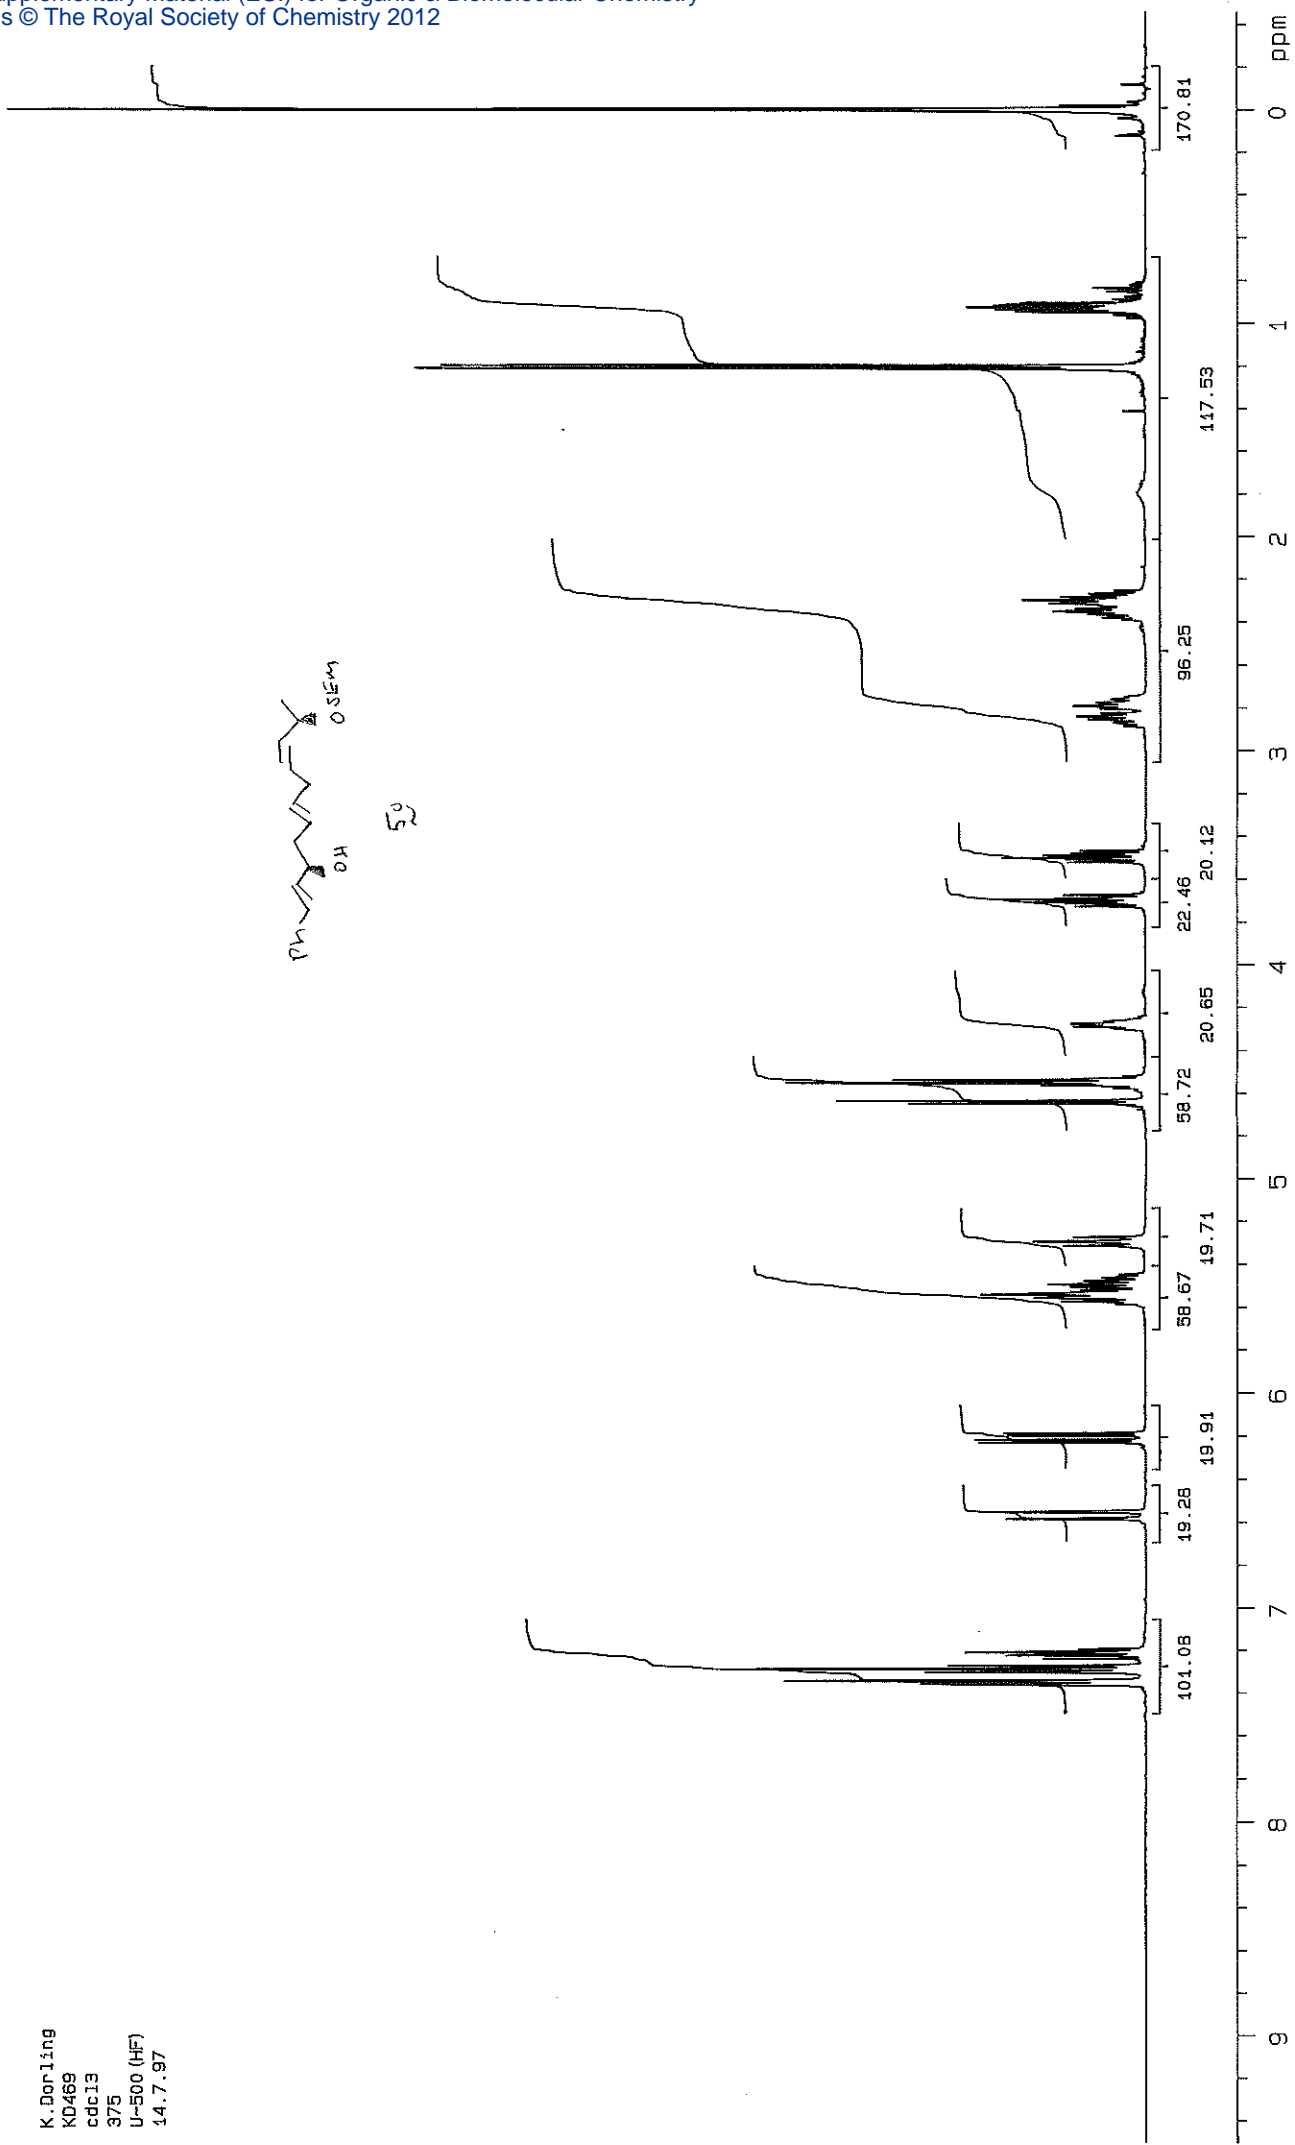

K. Dorling  
KD469  
cdc13  
375c  
U-500 (HF)  
14.7.97

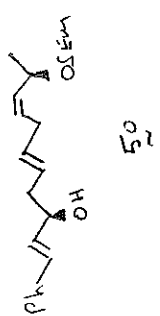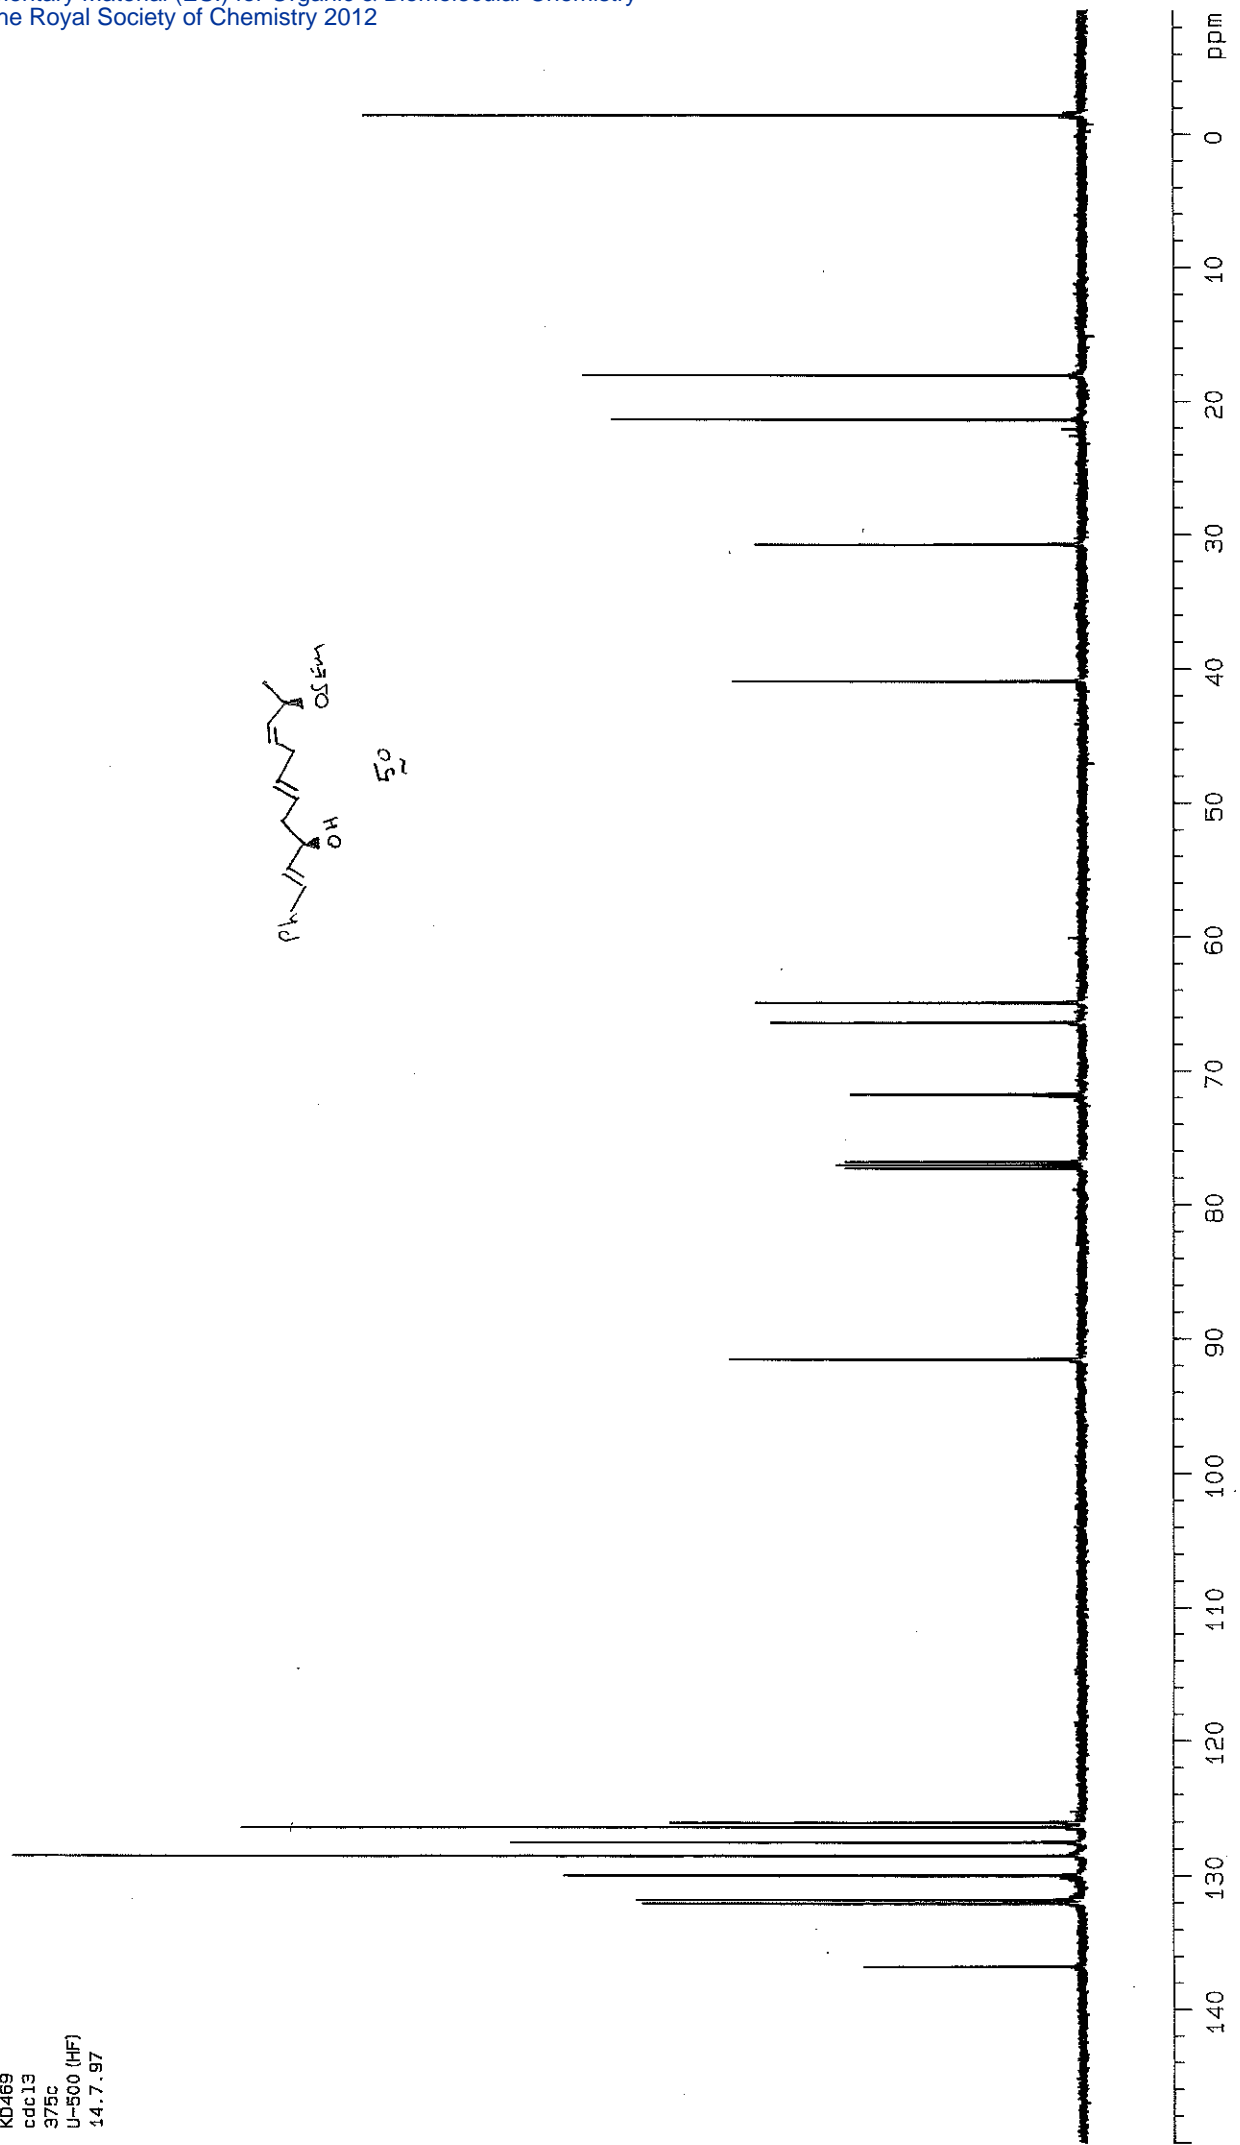

K. Dorling  
KD478  
cdc13  
391  
U-500 (HF)  
23.7.97

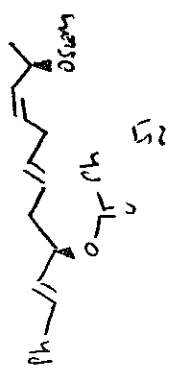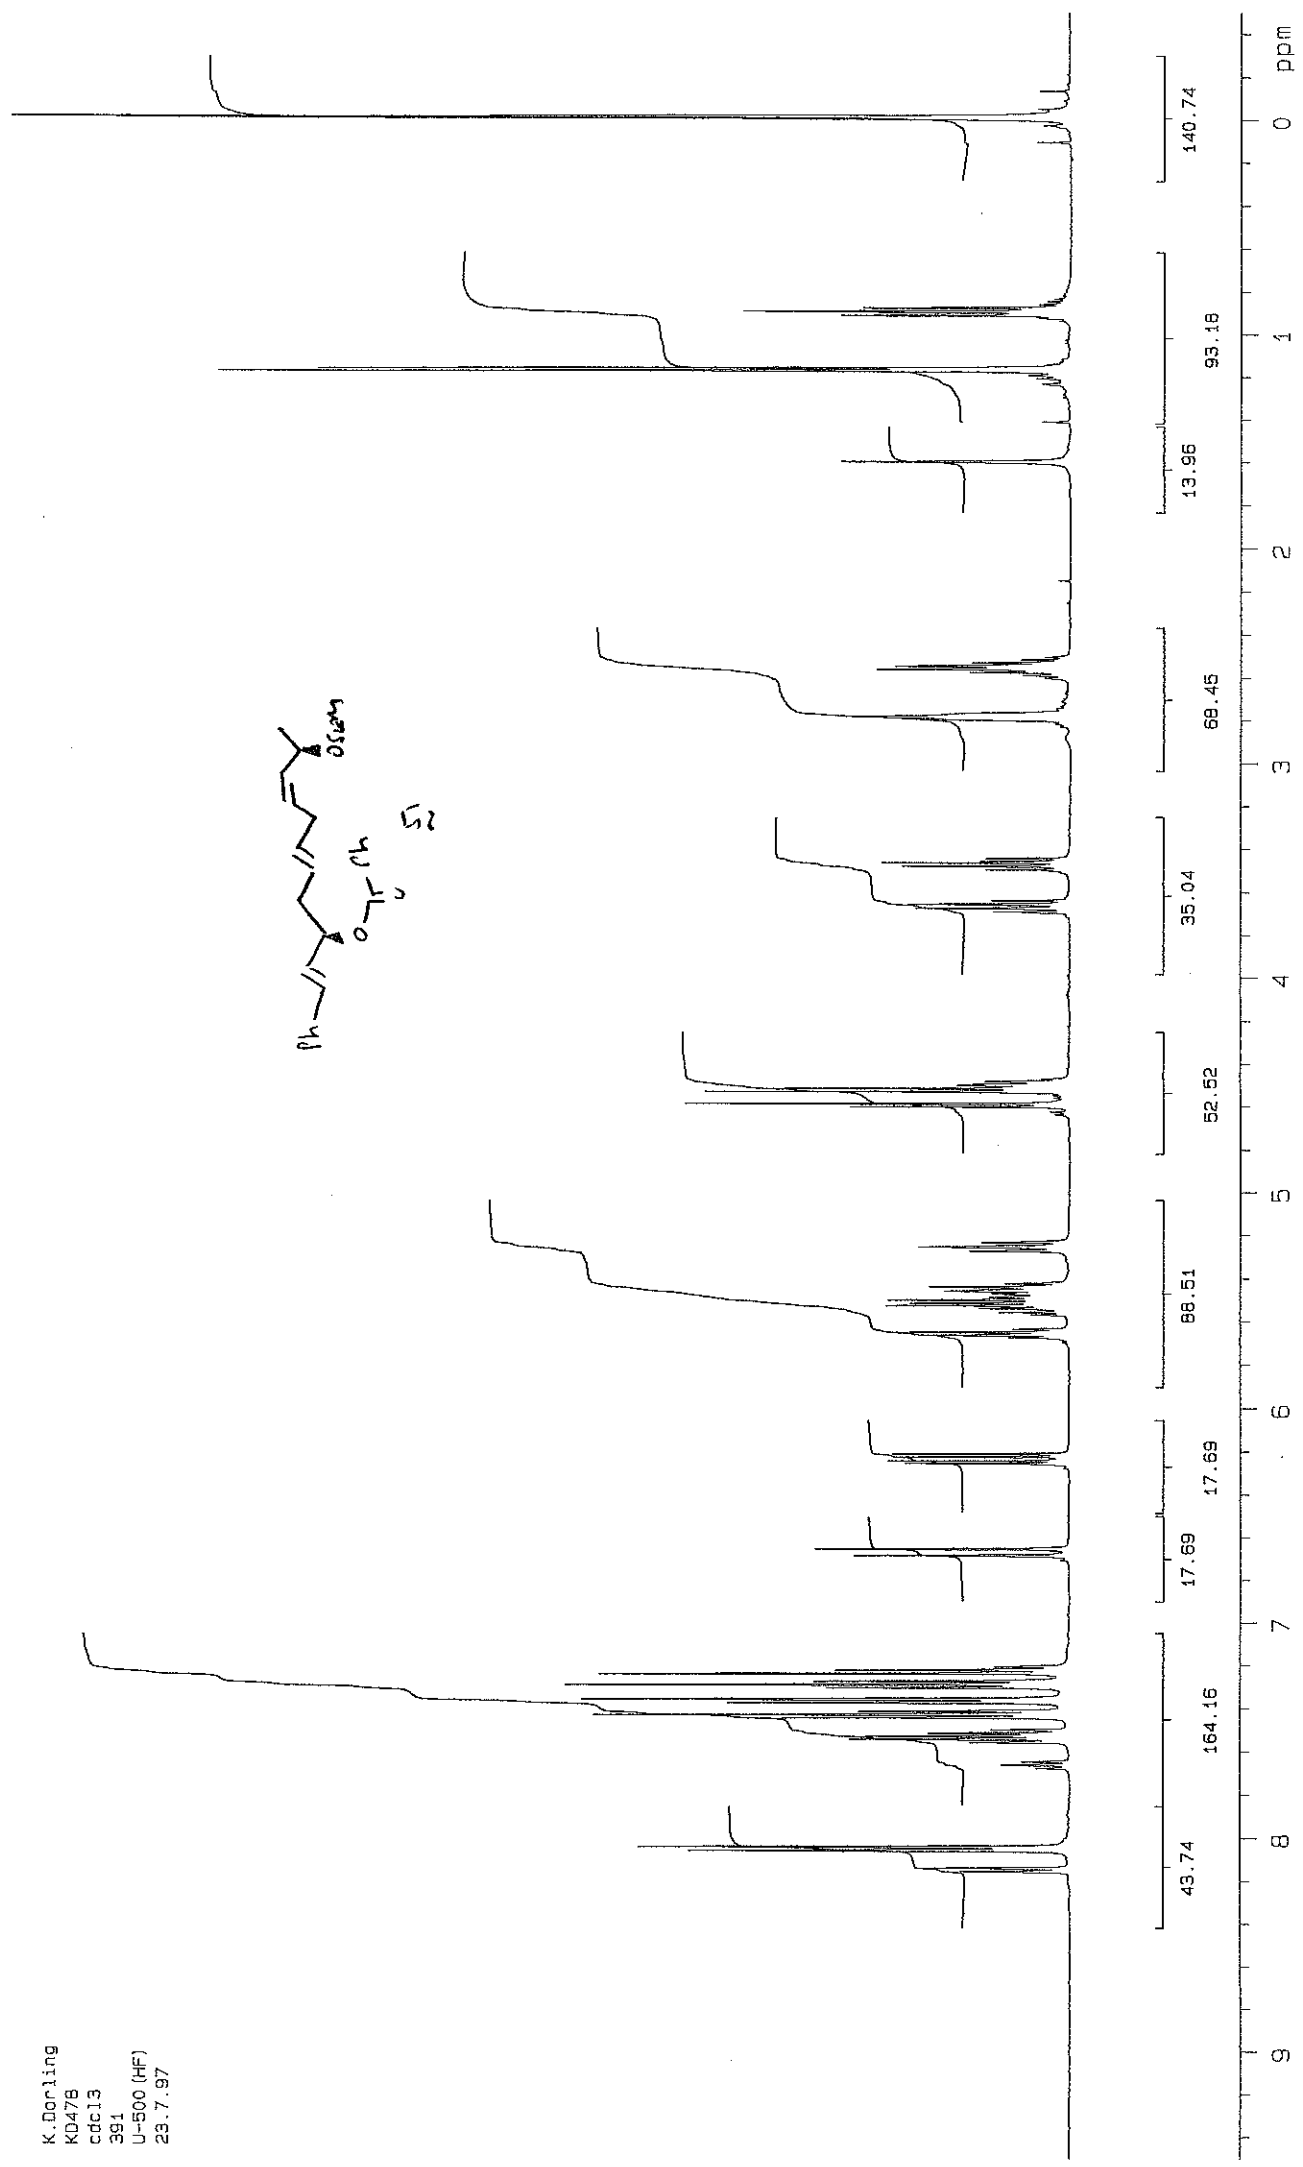

K. Dorling  
KD478  
cdc13  
391c  
U-500 (HF)  
23.7.97

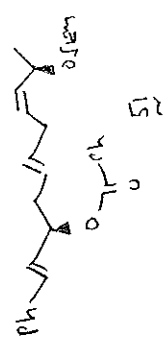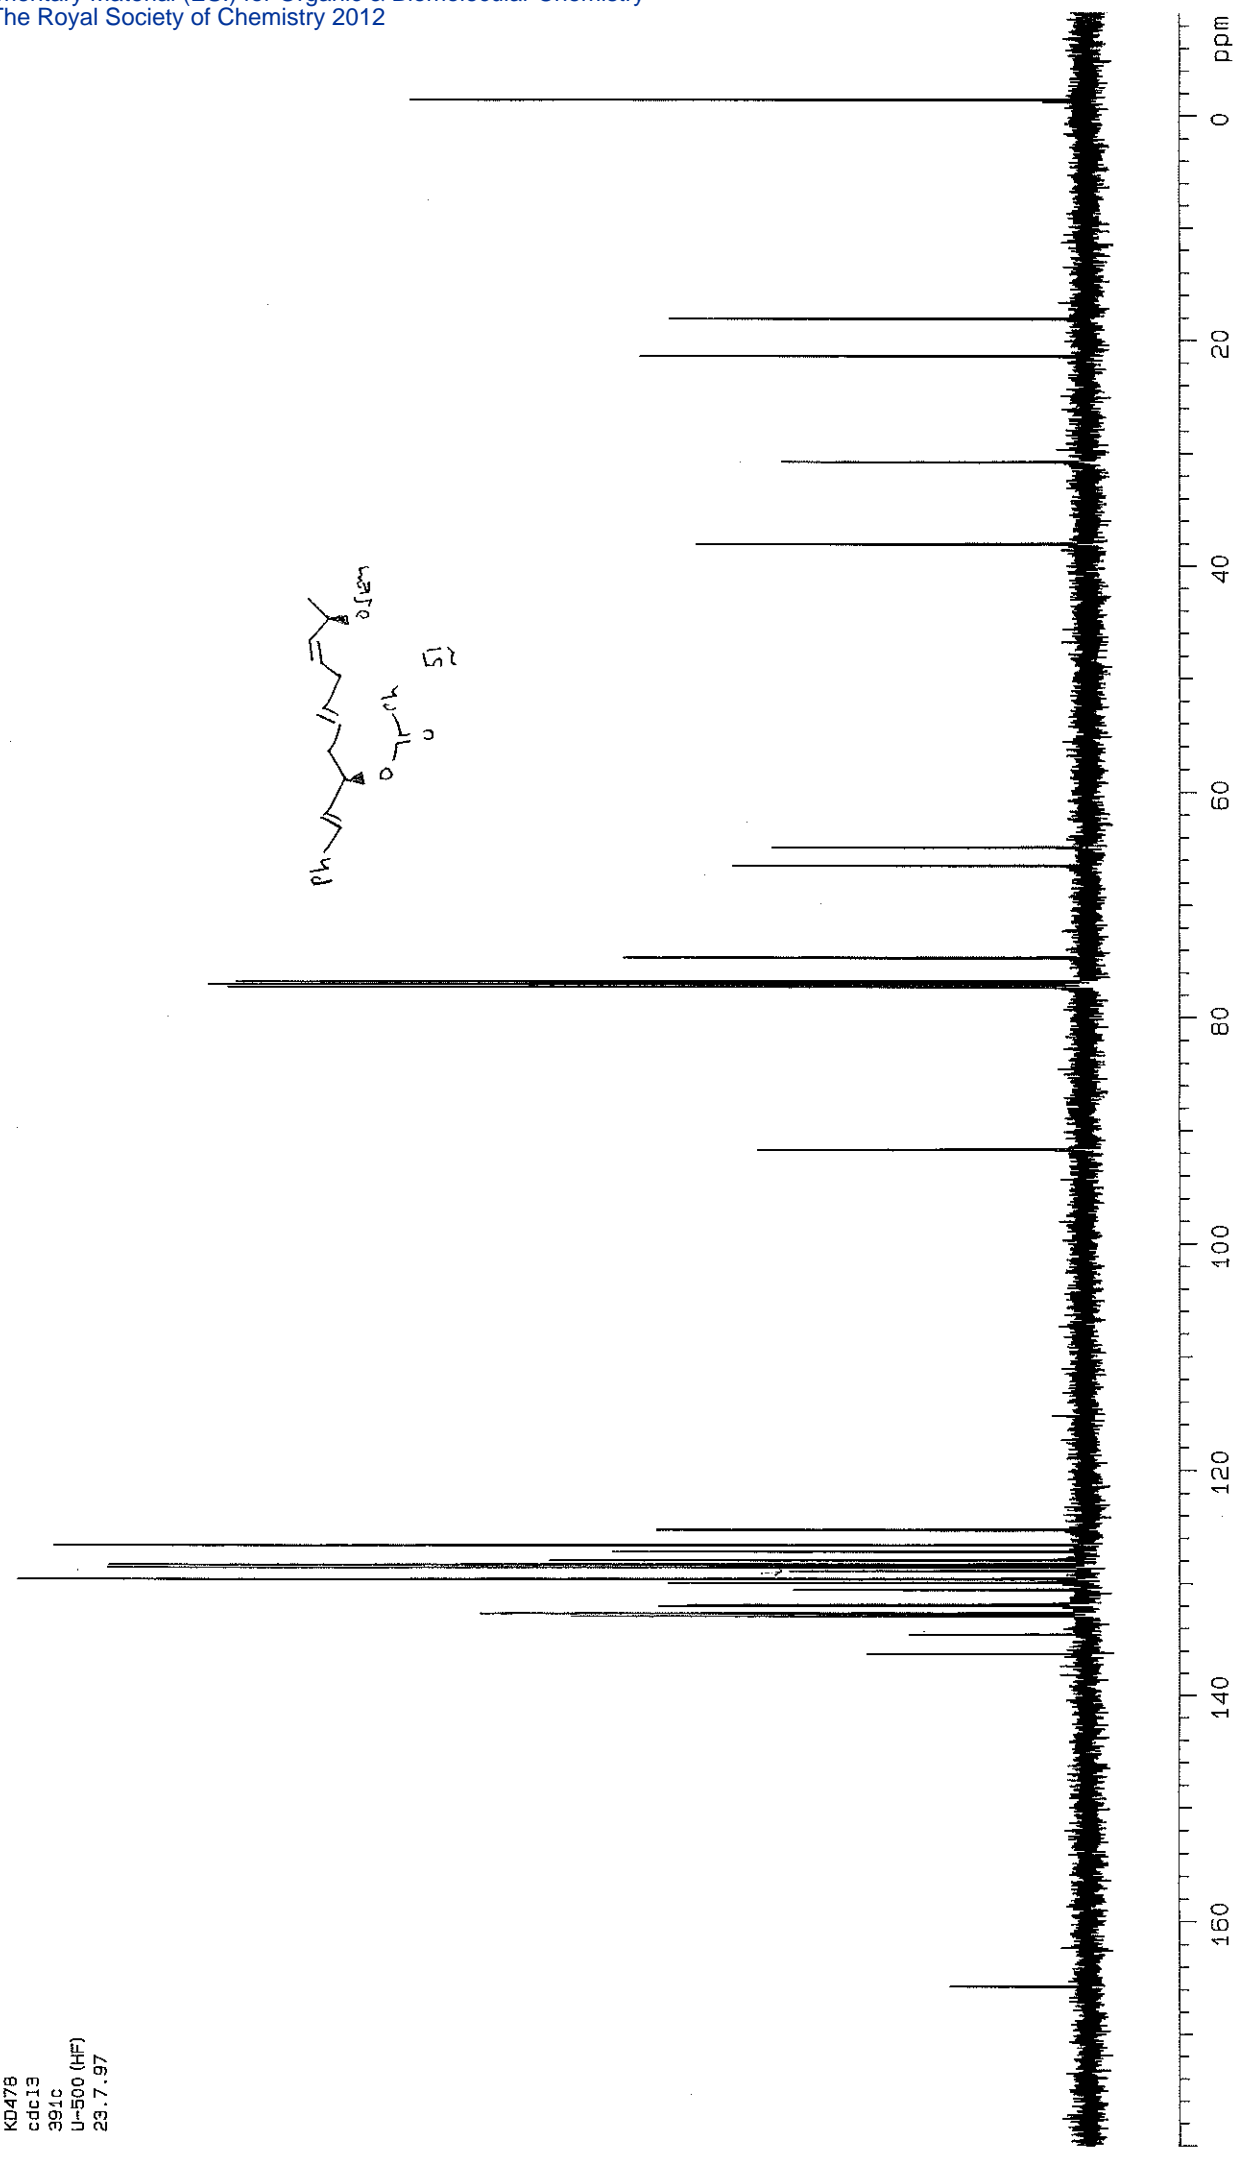

Supplement: c2ob25992c.pdf [file c2ob25992c.pdf]
